# Supplementary material for: Highly α-regioselective neodymium-mediated allylation of diaryl ketones
Source: Royal Society of Chemistry journal article supplement (doi:10.1039/c6ra18378f), 2016-01-01

## Supporting Information

Highly  $\alpha$ -Regioselective Neodymium-Mediated Allylation of Diaryl Ketones

*Fang Zhang, Ru Wang, San Wu, Peipei Wang and Songlin Zhang\**

*Key Laboratory of Organic Synthesis of Jiangsu Province, College of Chemistry,  
Chemical Engineering and Materials*

*Science, Dushu Lake Campus, Soochow University, Suzhou, 215123, People's  
Republic of China.*

*zhangsl@suda.edu.cn*

$^1\text{H}$ - and  $^{13}\text{C}$ -NMR for 2a

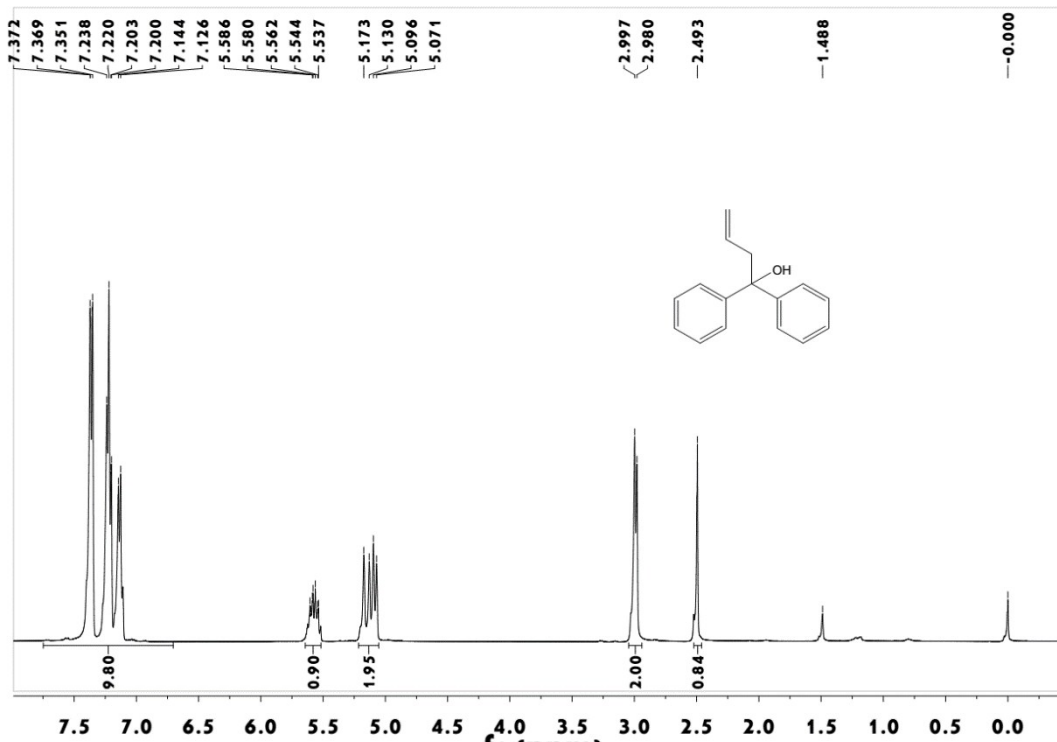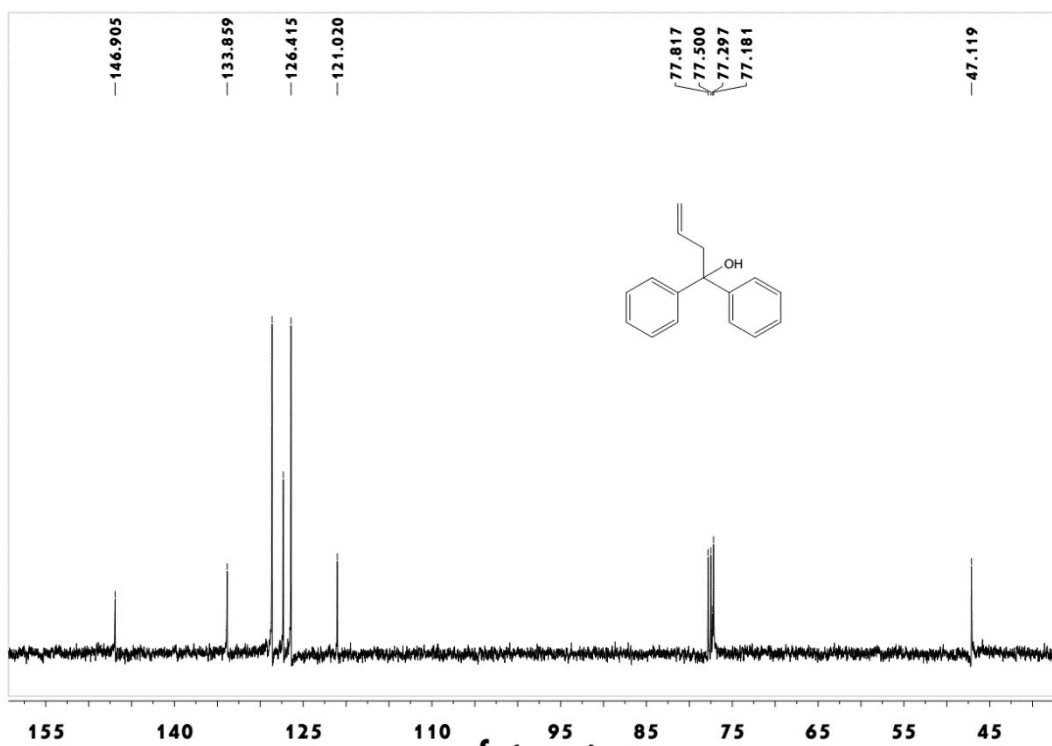

$^1\text{H}$ - and  $^{13}\text{C}$ -NMR for **2b**

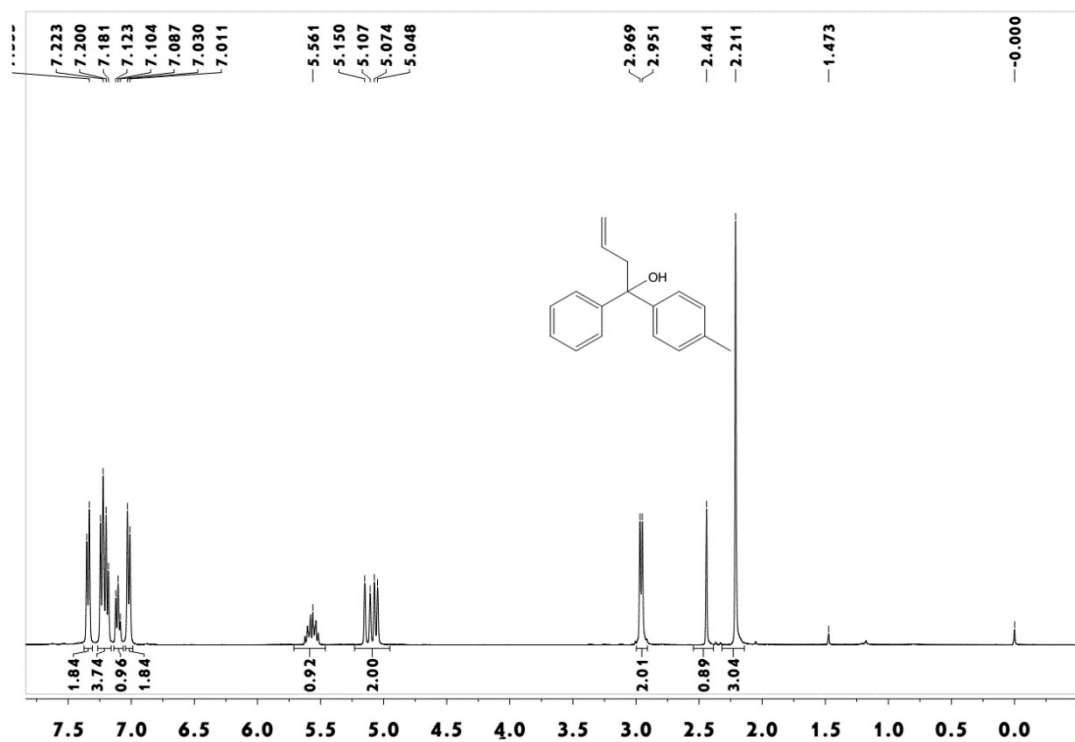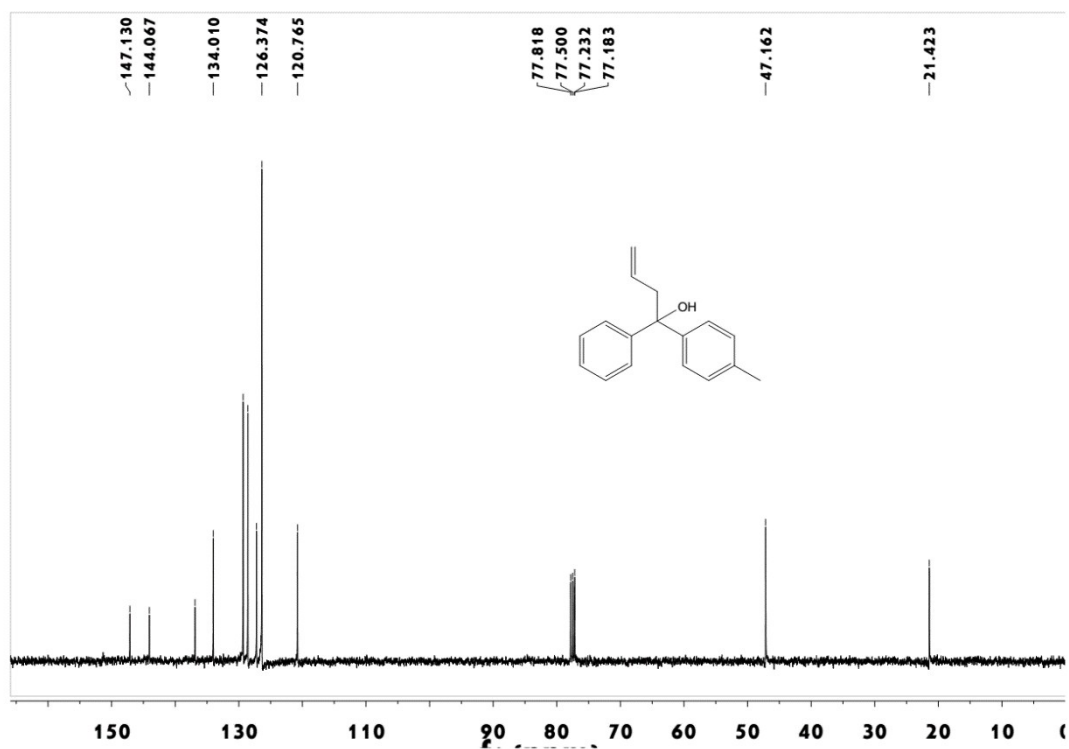

$^1\text{H}$ - and  $^{13}\text{C}$ -NMR for **2c**

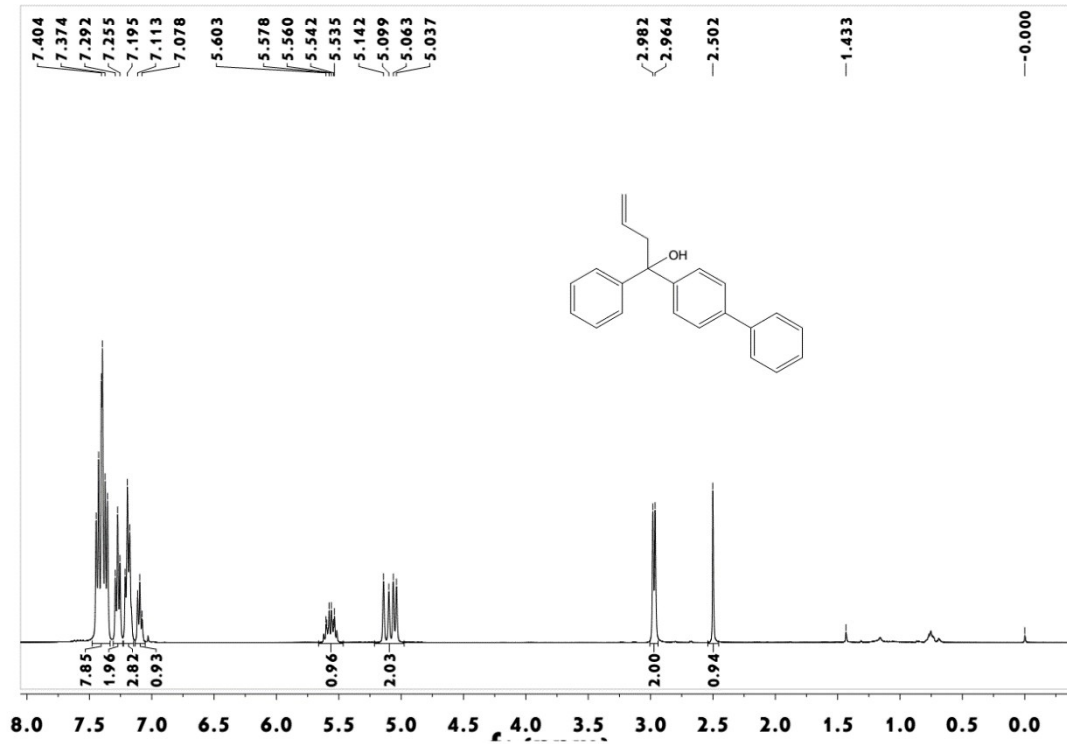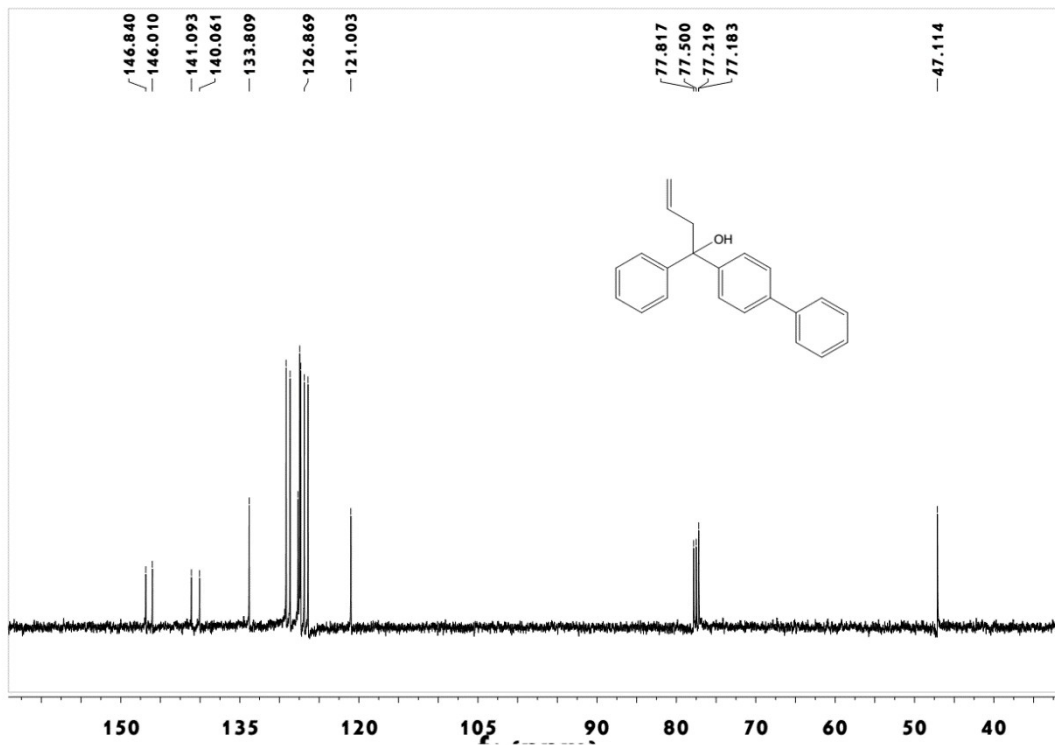

$^1\text{H}$ - and  $^{13}\text{C}$ -NMR for **2d**

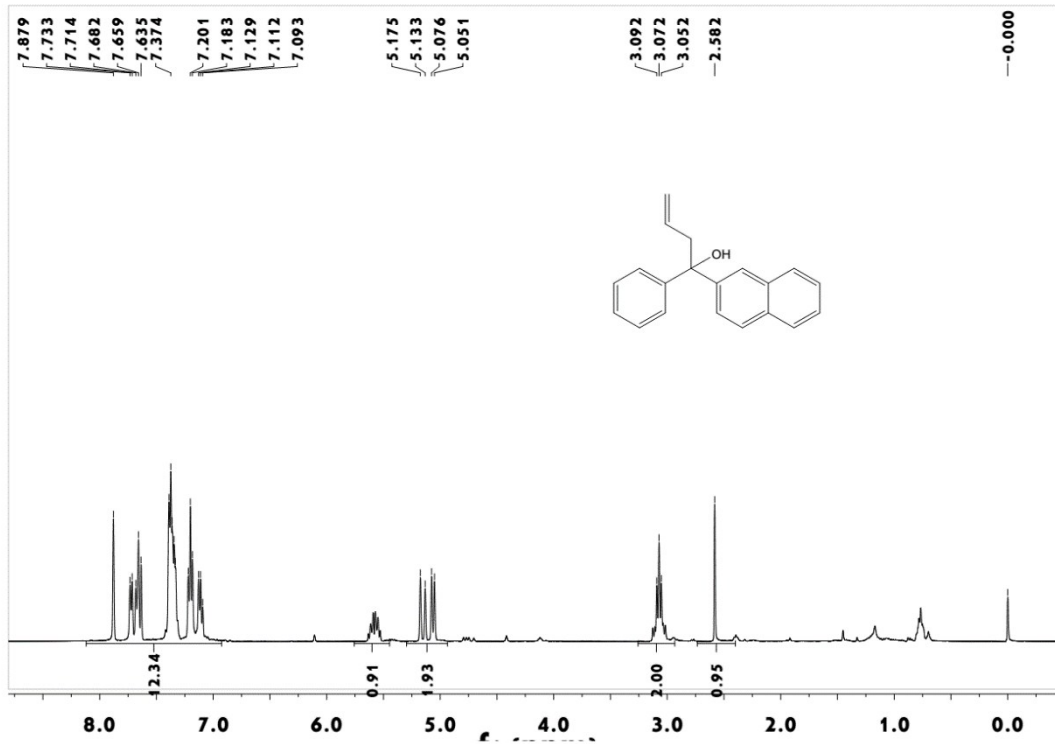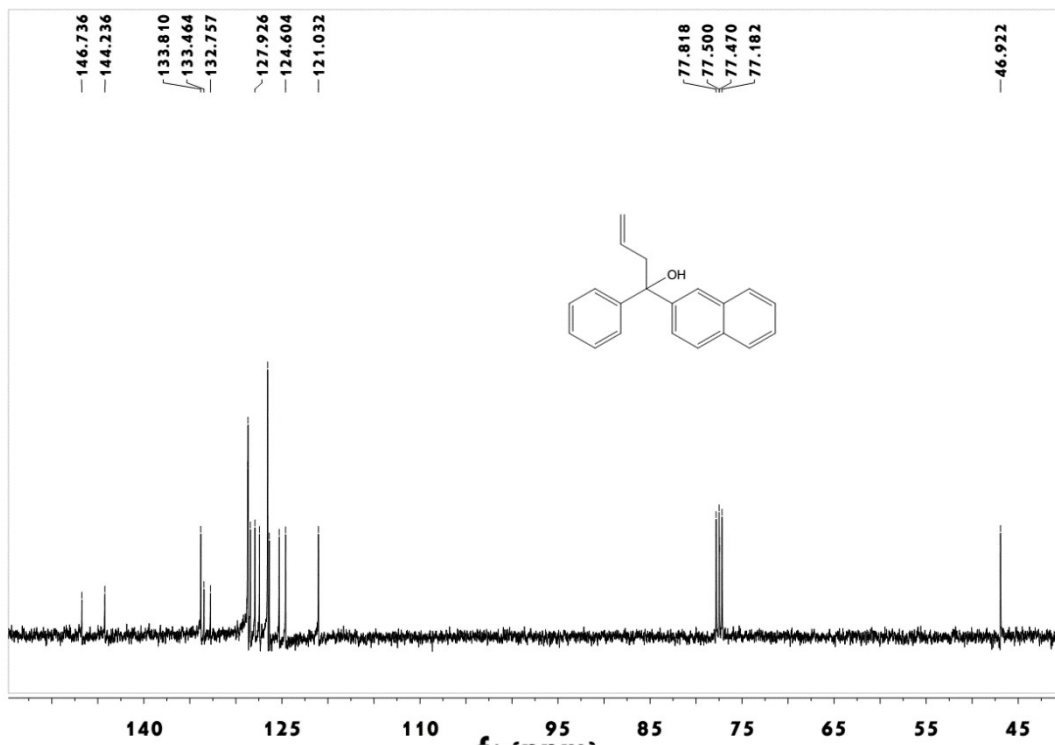

$^1\text{H}$ - and  $^{13}\text{C}$ -NMR for 2e

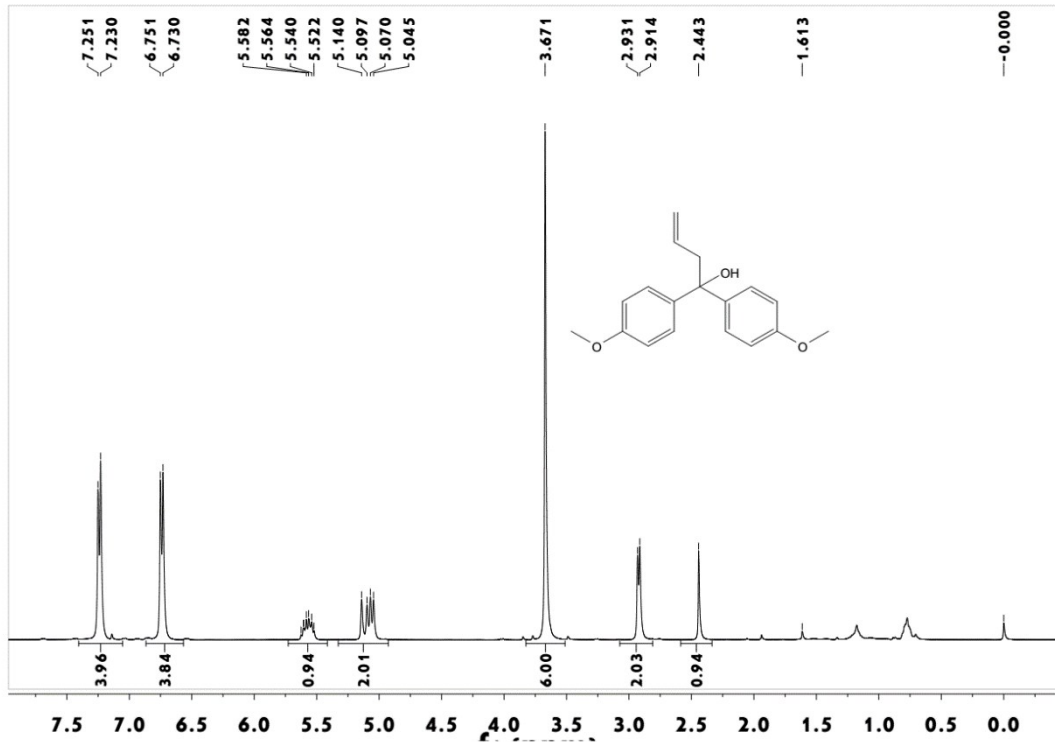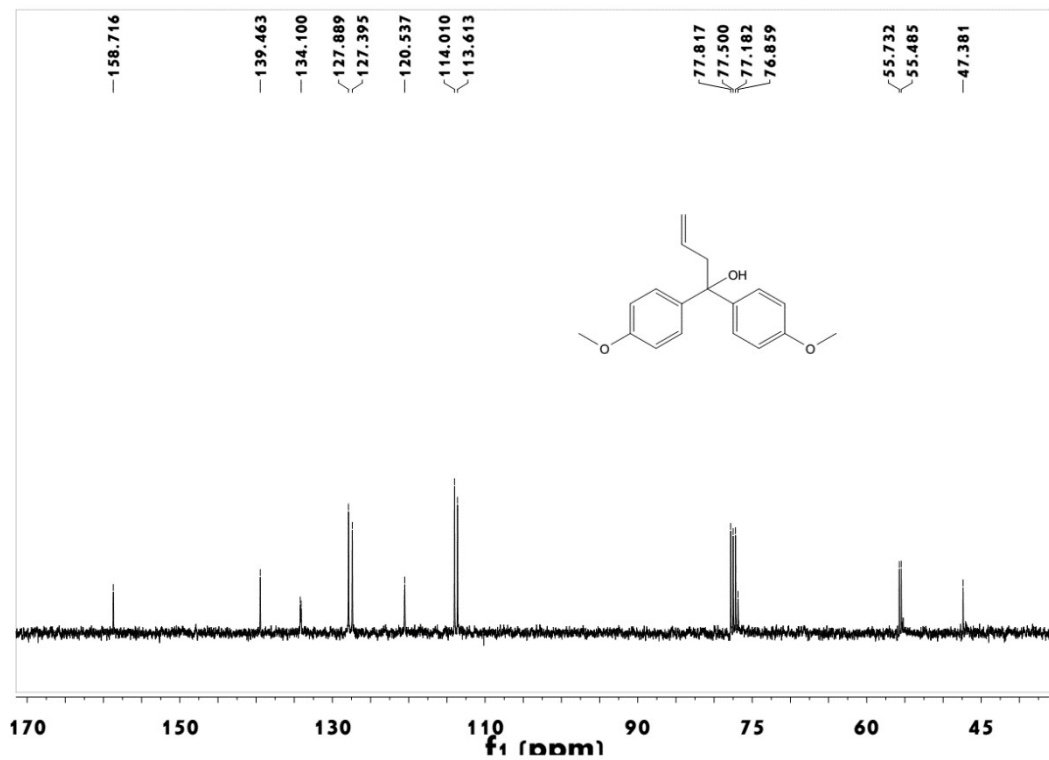

$^1\text{H}$ - and  $^{13}\text{C}$ -NMR for **2f**

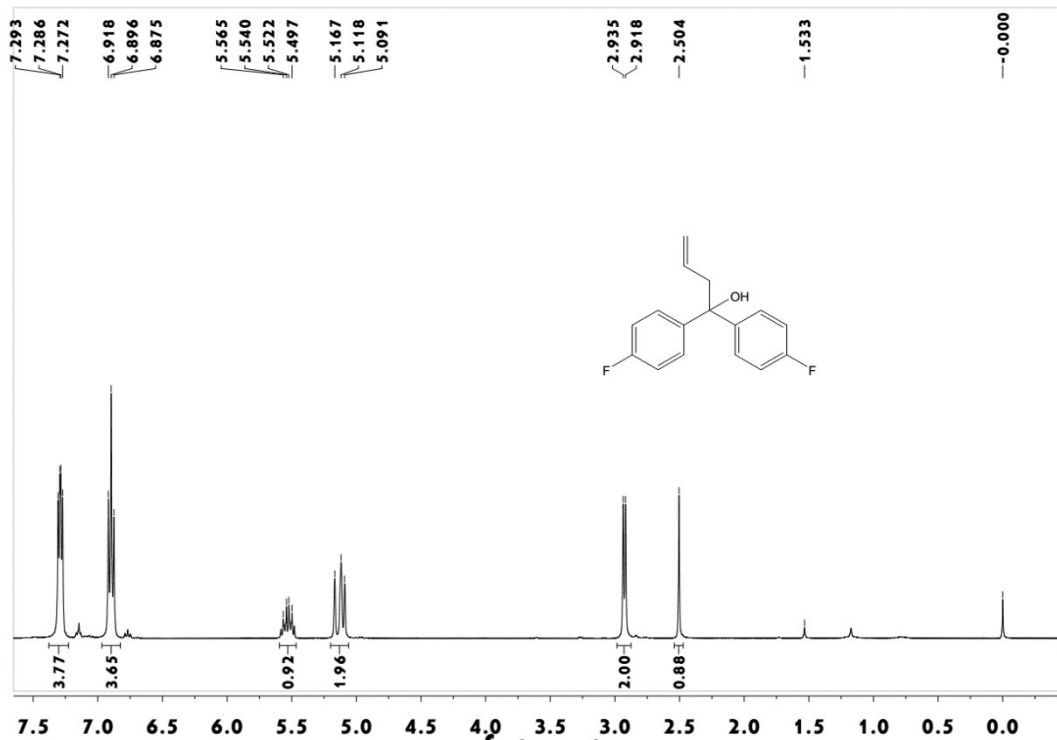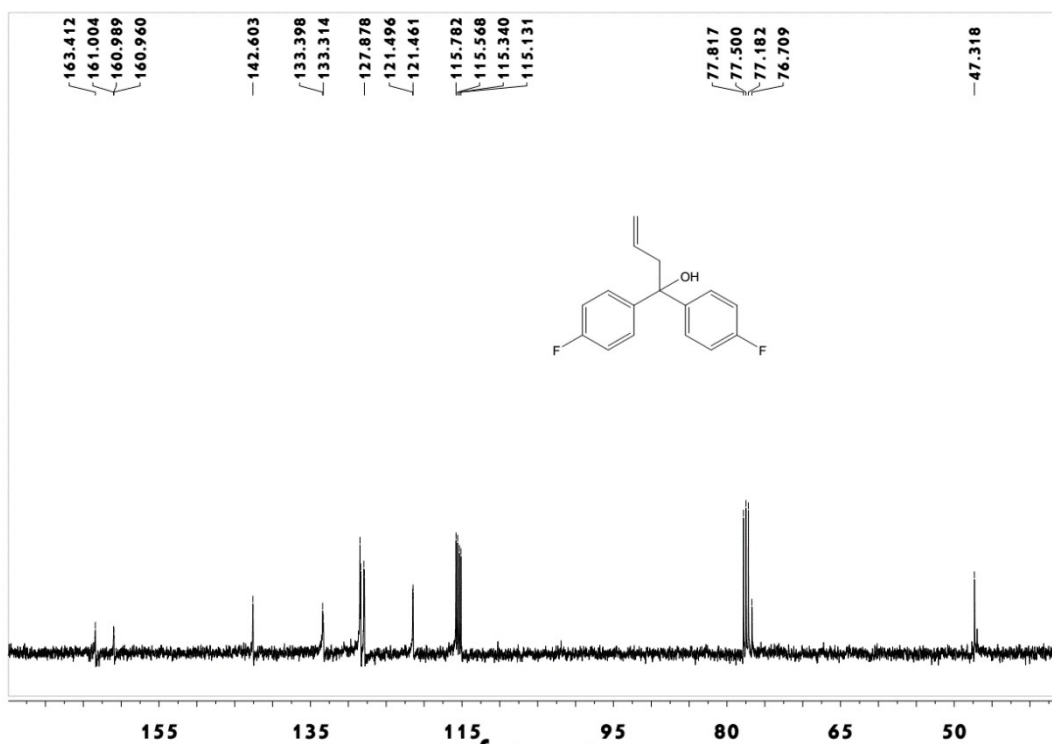

$^1\text{H}$ - and  $^{13}\text{C}$ -NMR for 2g

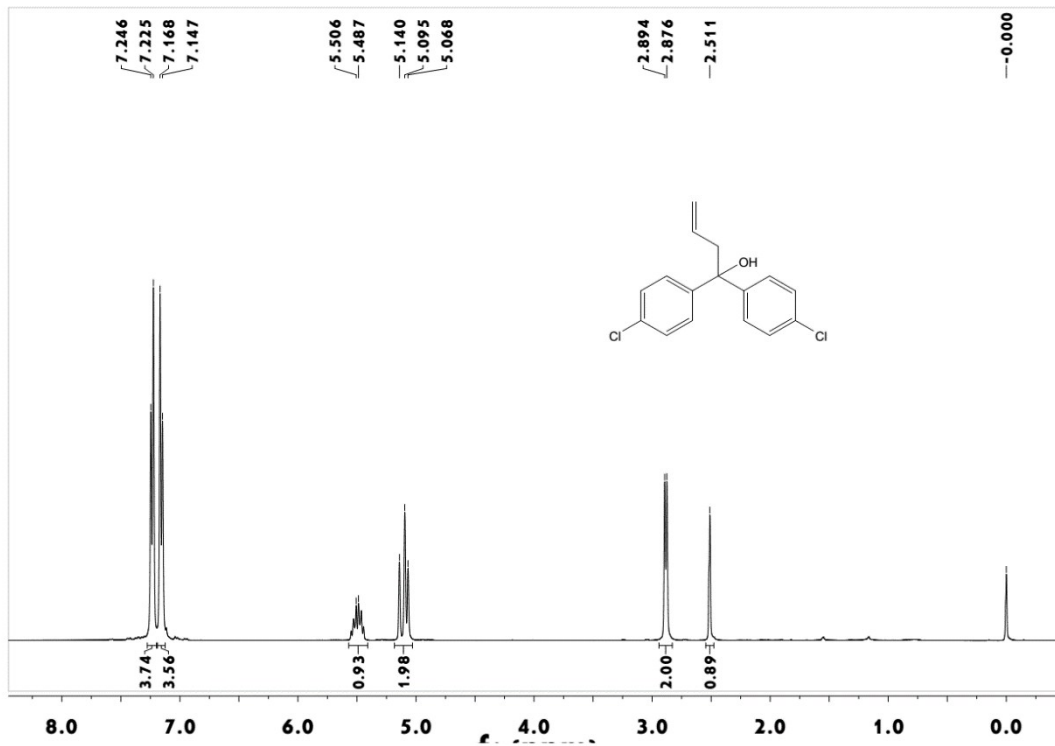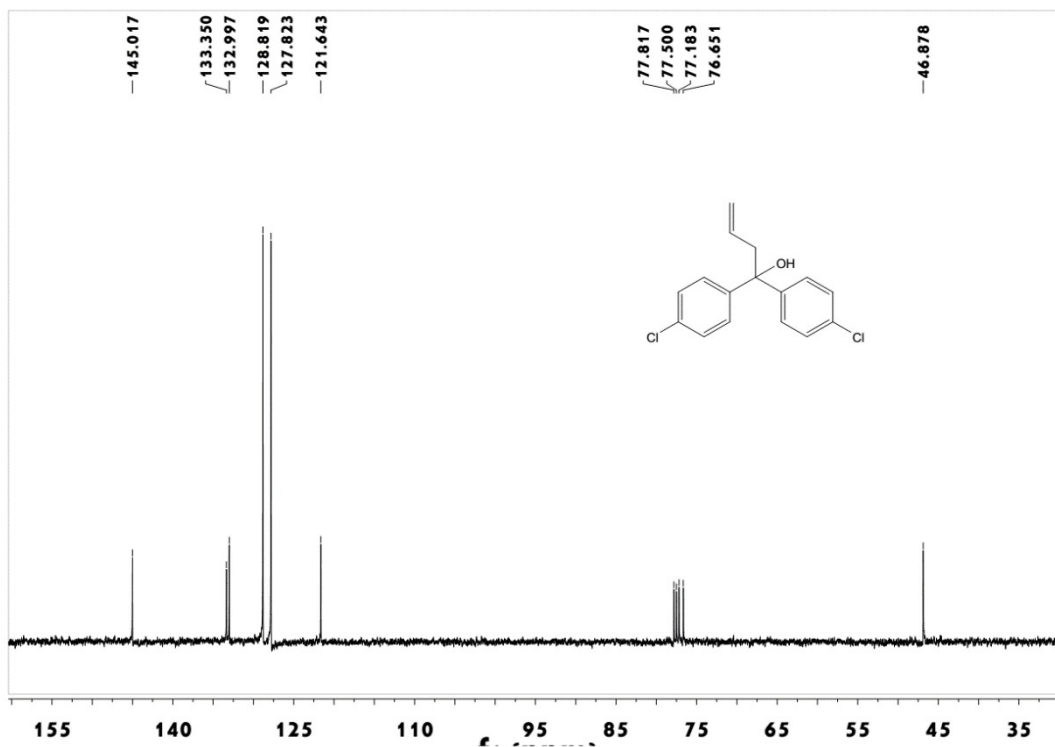



$^1\text{H}$ - and  $^{13}\text{C}$ -NMR for 2h

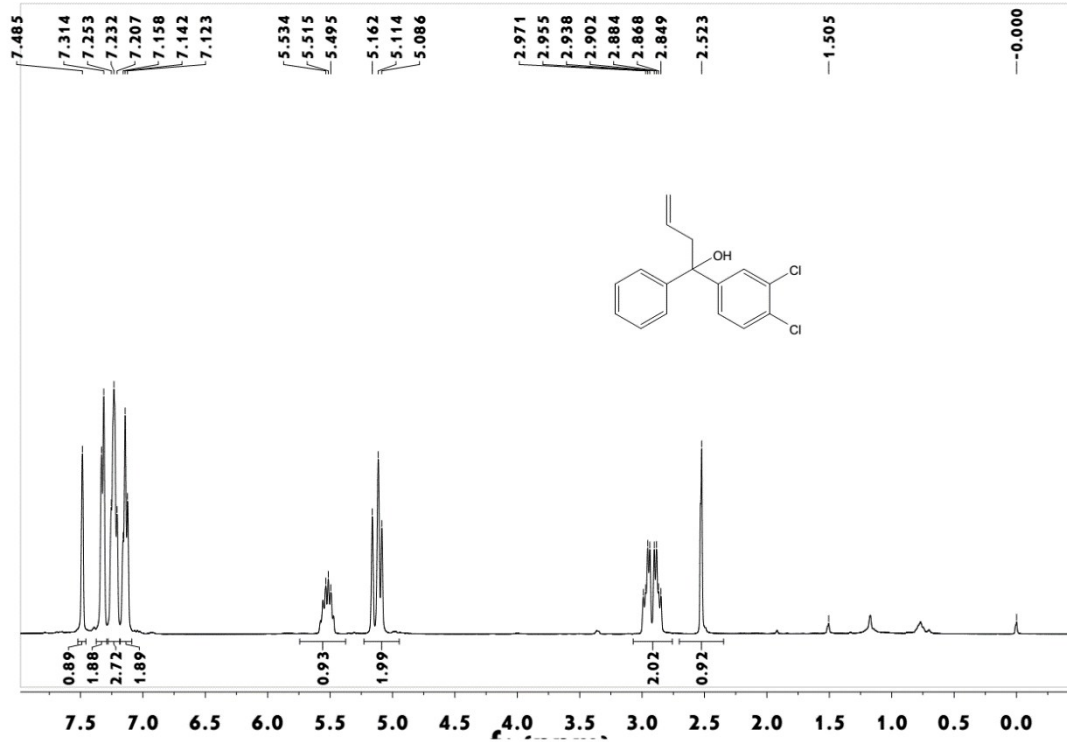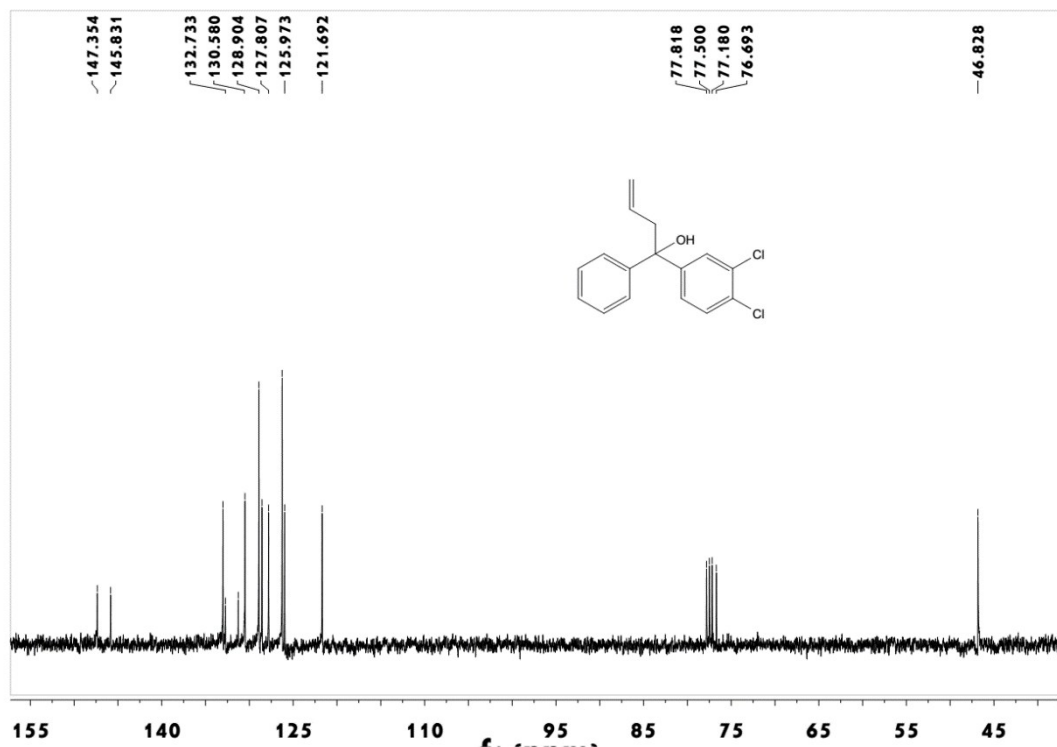

$^1\text{H}$ - and  $^{13}\text{C}$ -NMR for 2m

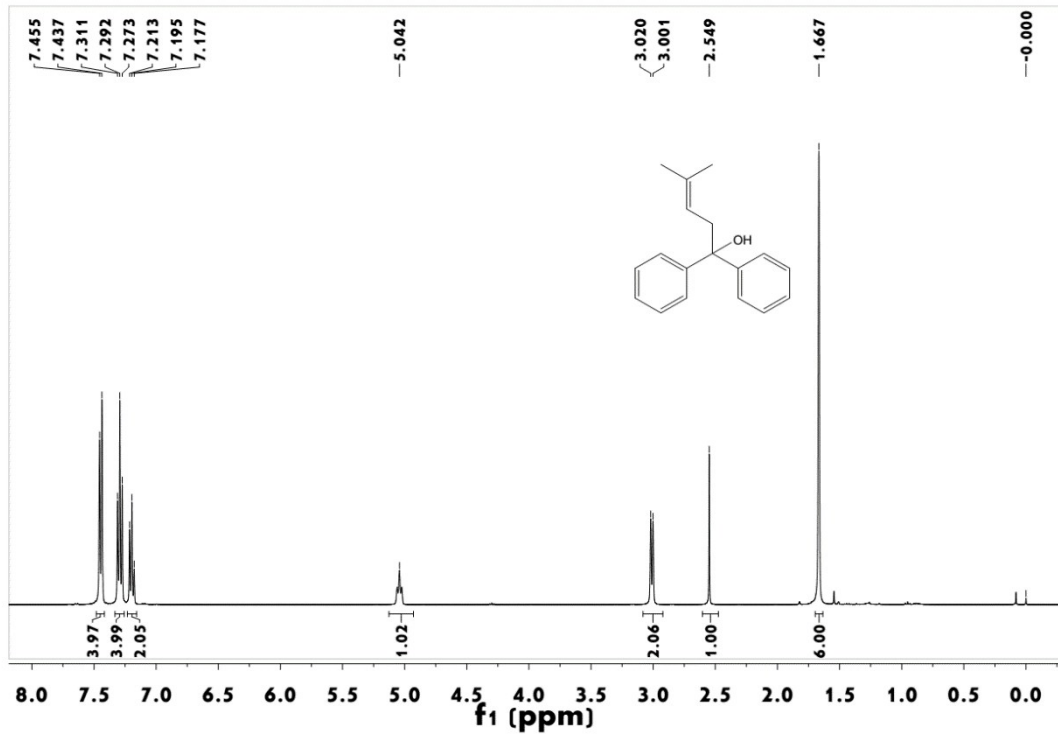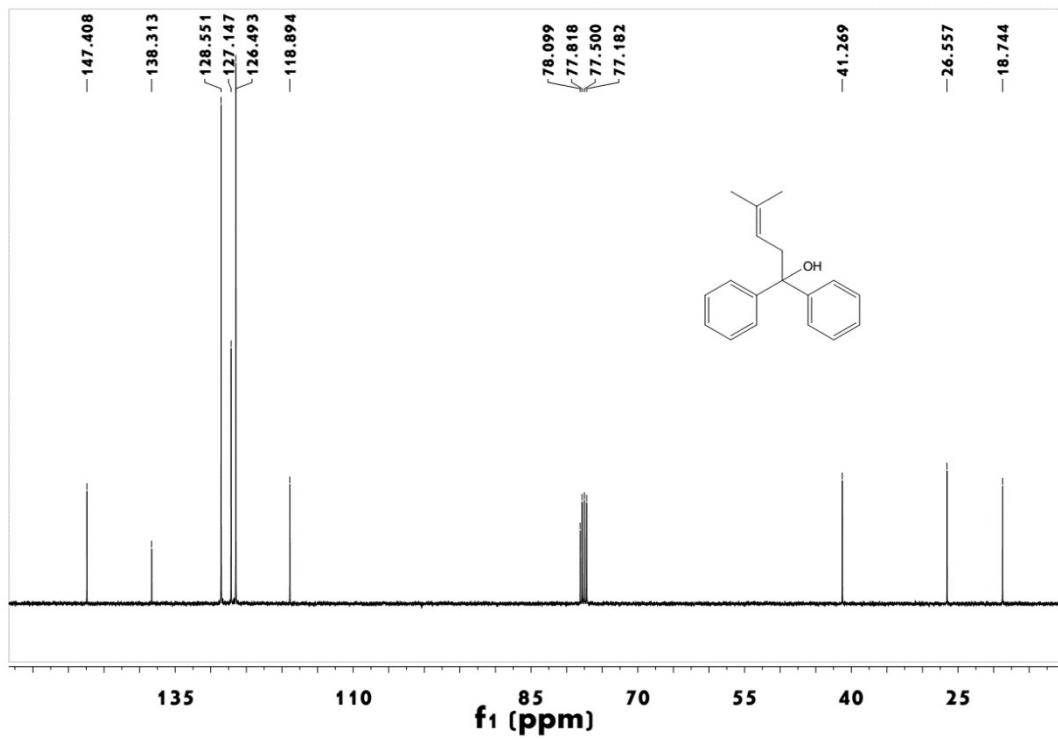

$^1\text{H}$ - and  $^{13}\text{C}$ -NMR for 2n

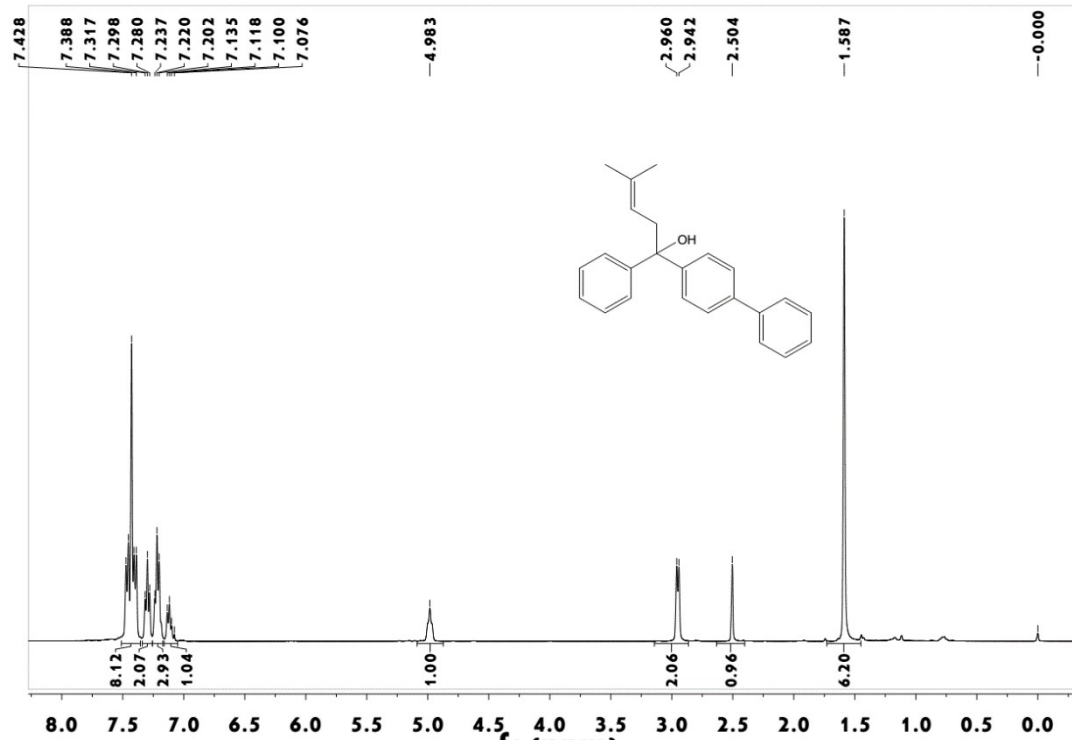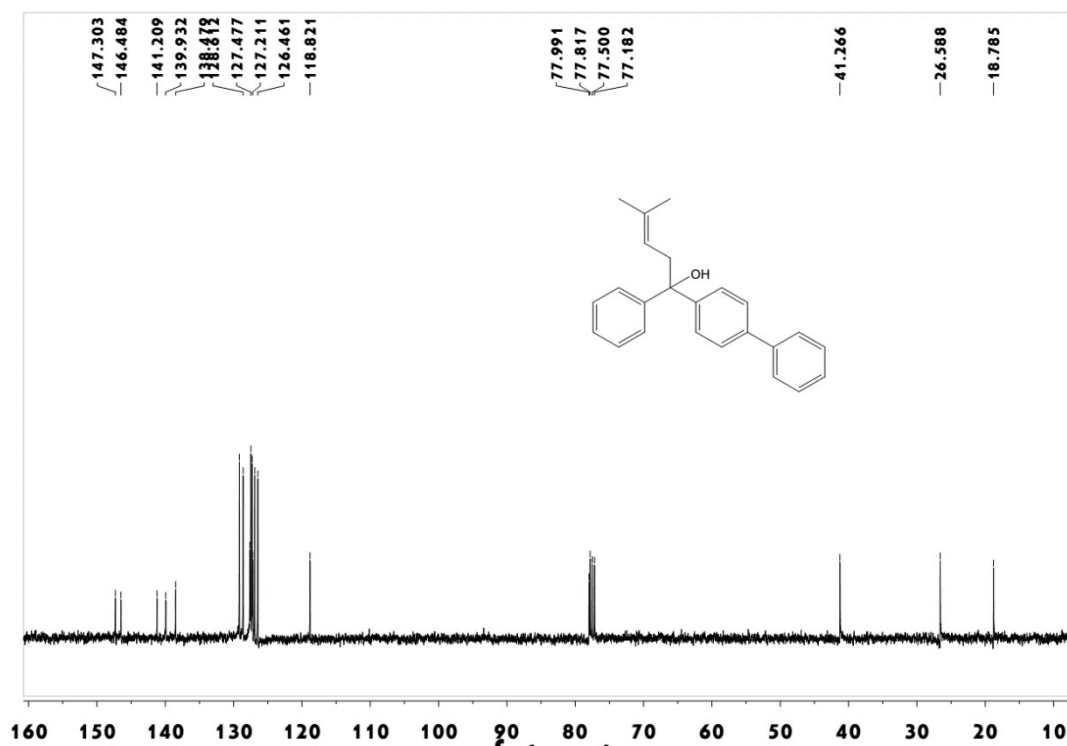

$^1\text{H}$ - and  $^{13}\text{C}$ -NMR for **2o**

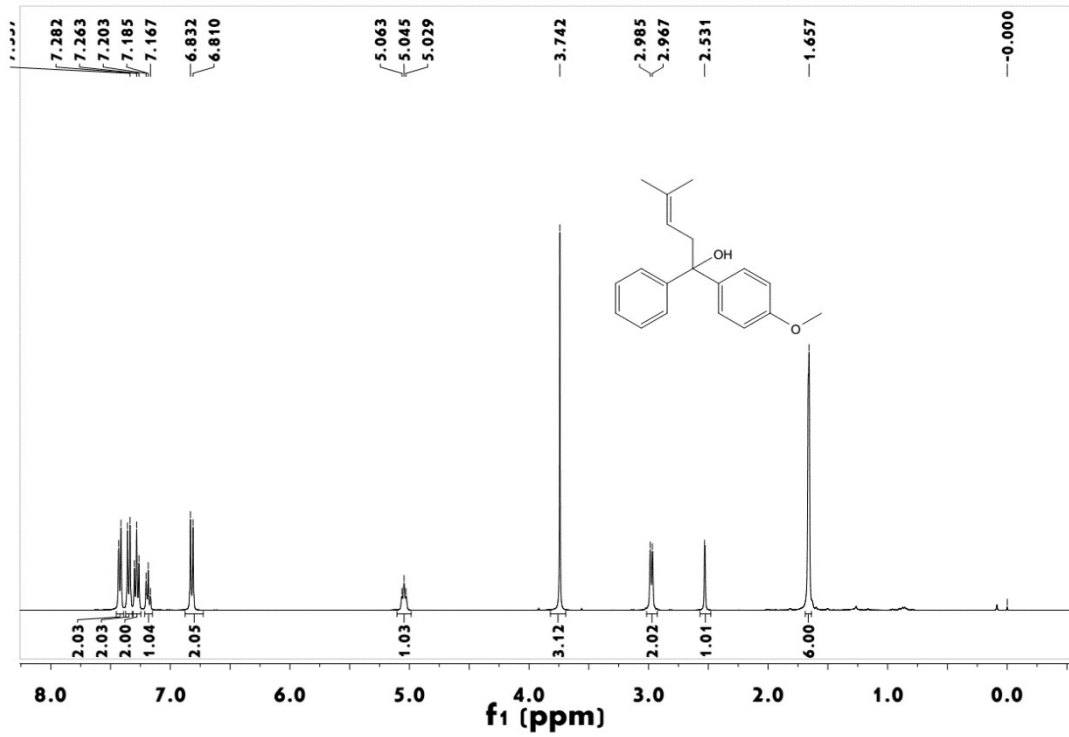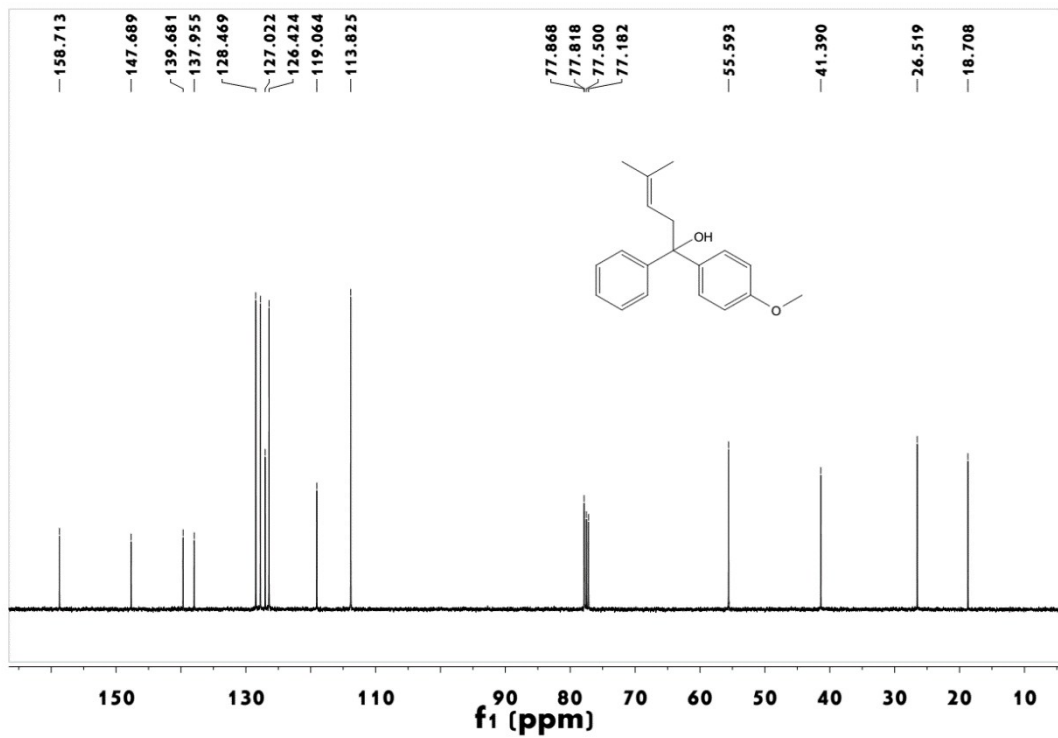

$^1\text{H}$ - and  $^{13}\text{C}$ -NMR for 2p

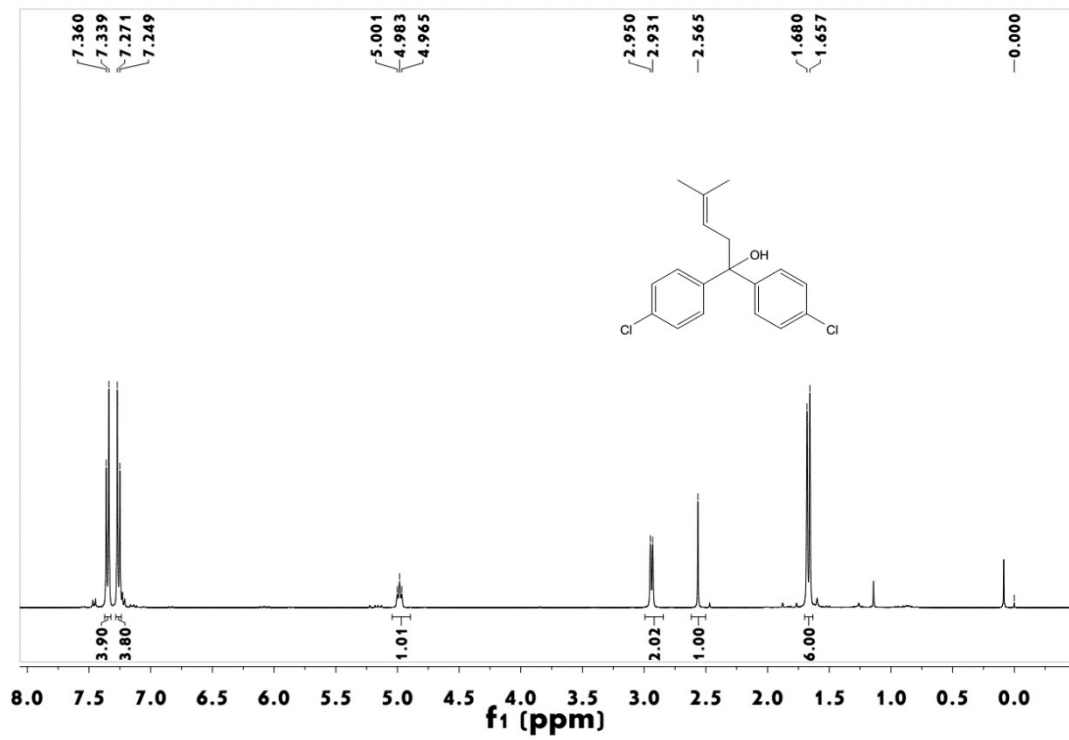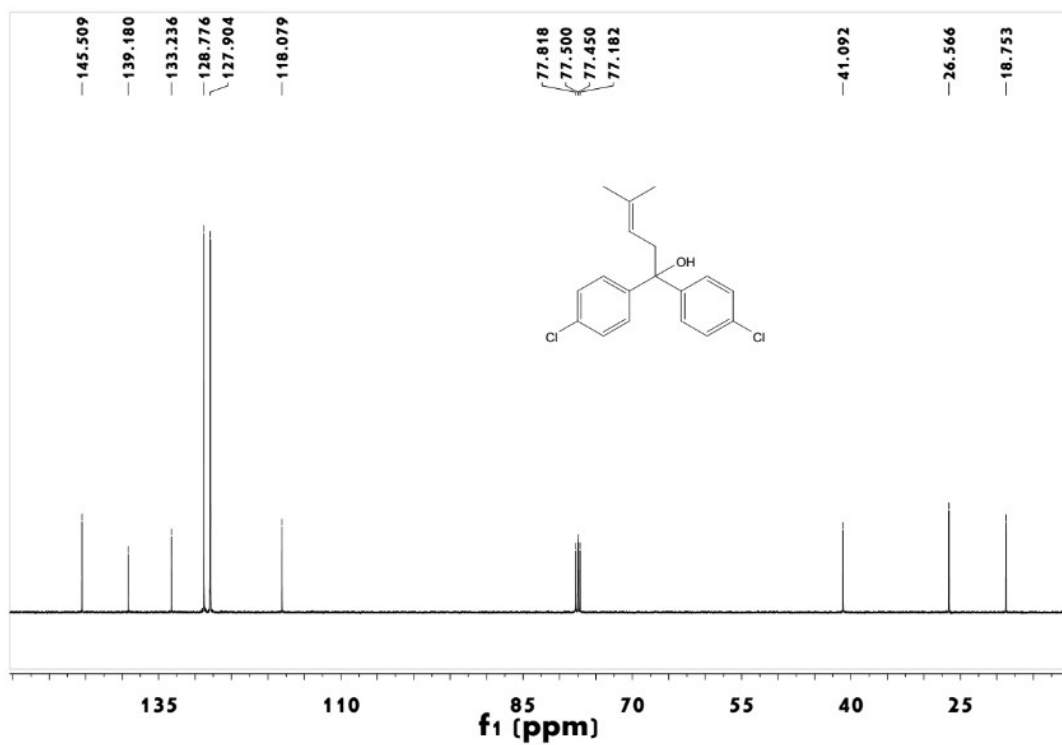

$^1\text{H}$ - and  $^{13}\text{C}$ -NMR for 2q

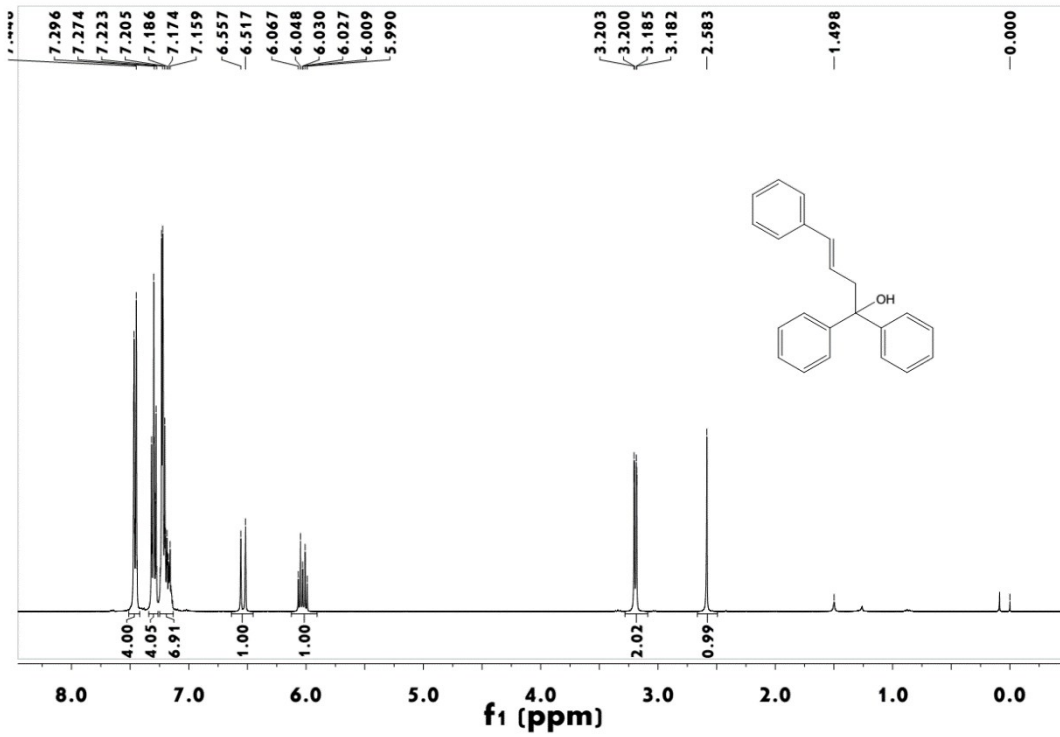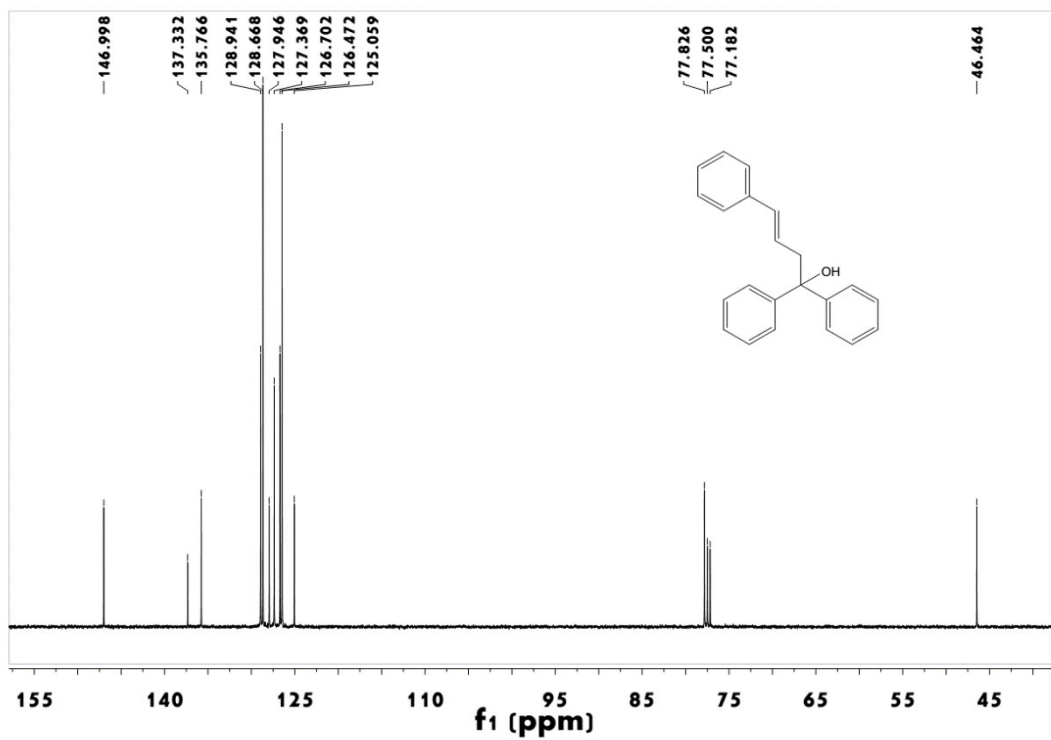

$^1\text{H}$ - and  $^{13}\text{C}$ -NMR for 2r

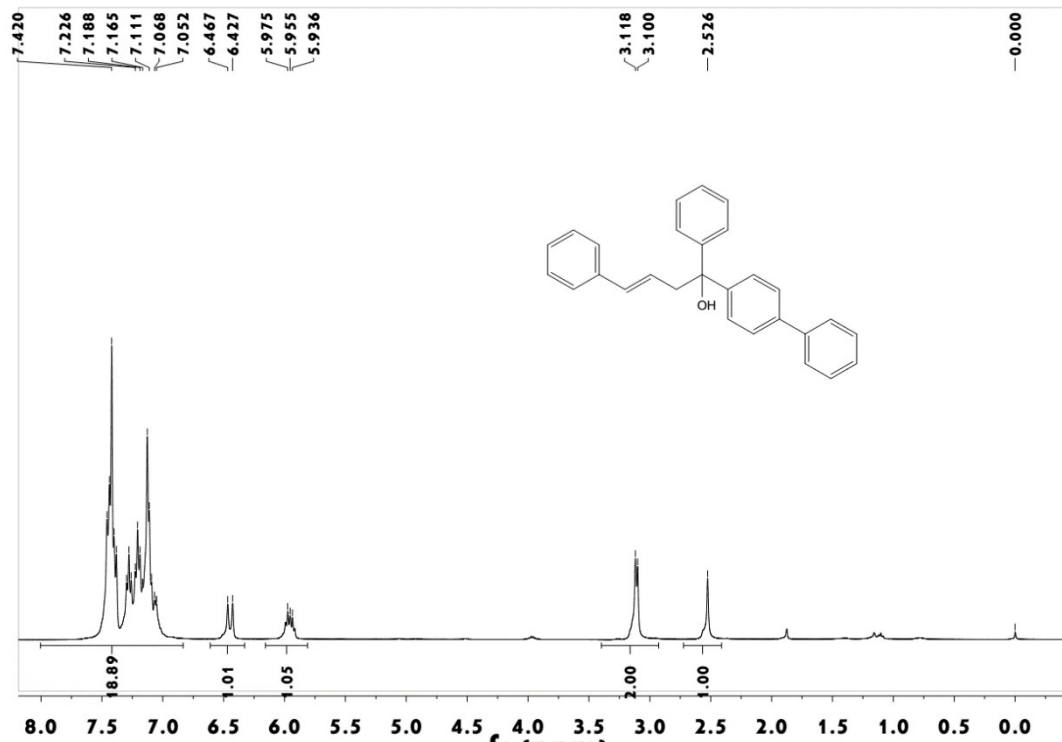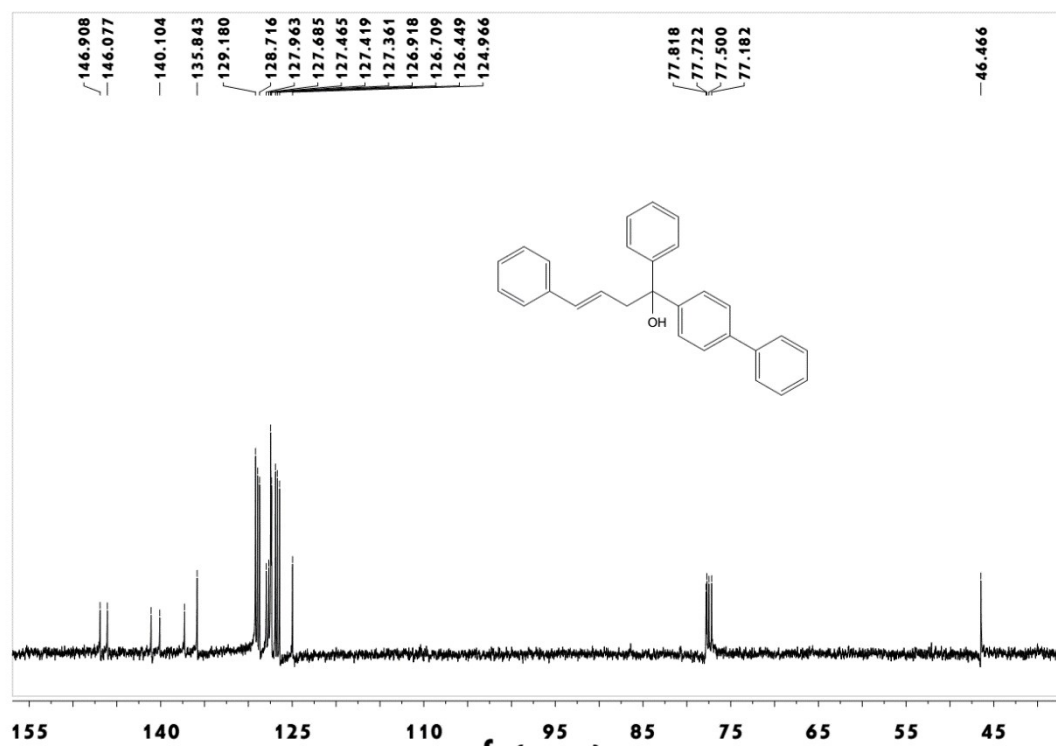

$^1\text{H}$ - and  $^{13}\text{C}$ -NMR for 2s

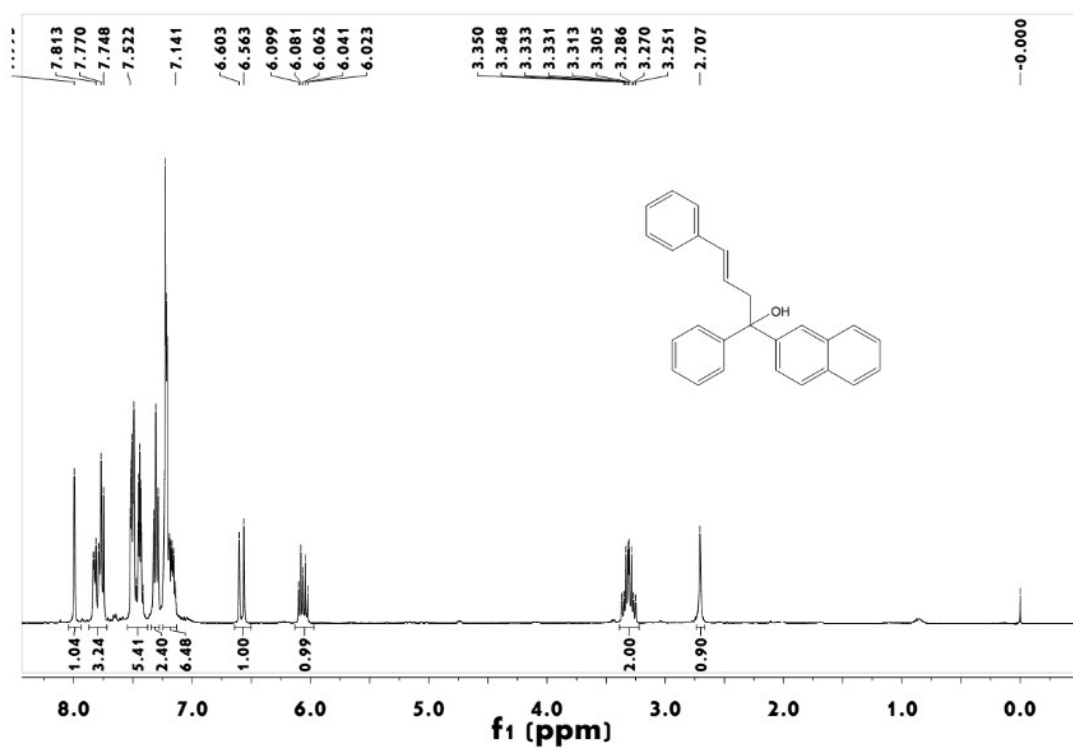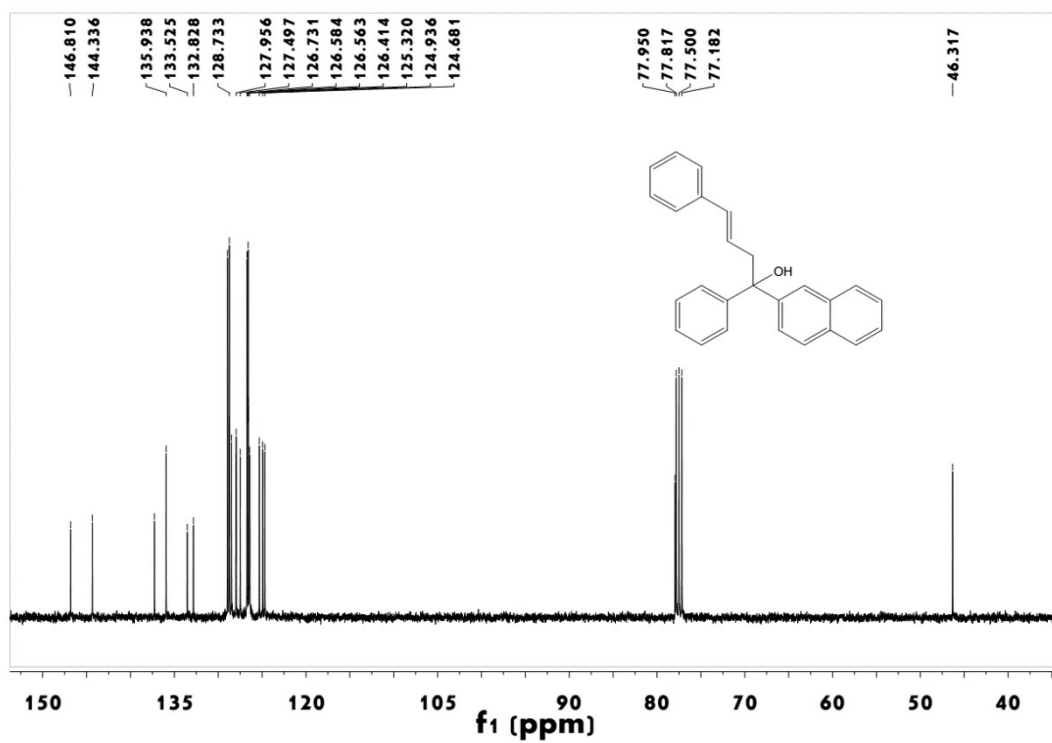



$^1\text{H}$ - and  $^{13}\text{C}$ -NMR for **2t**

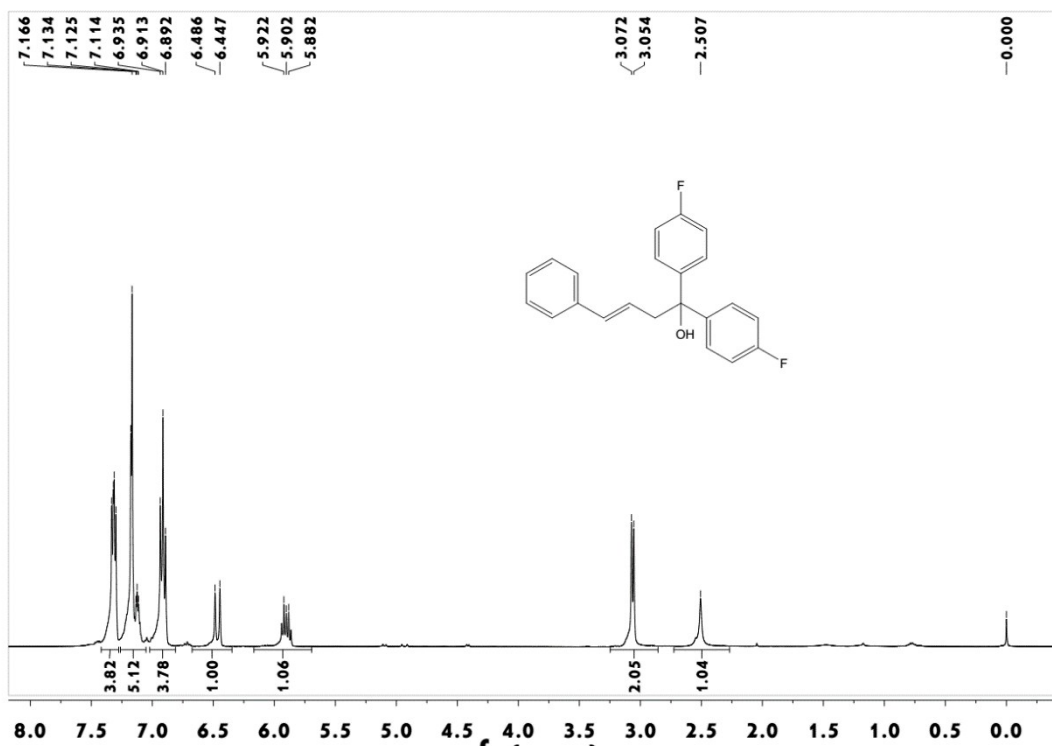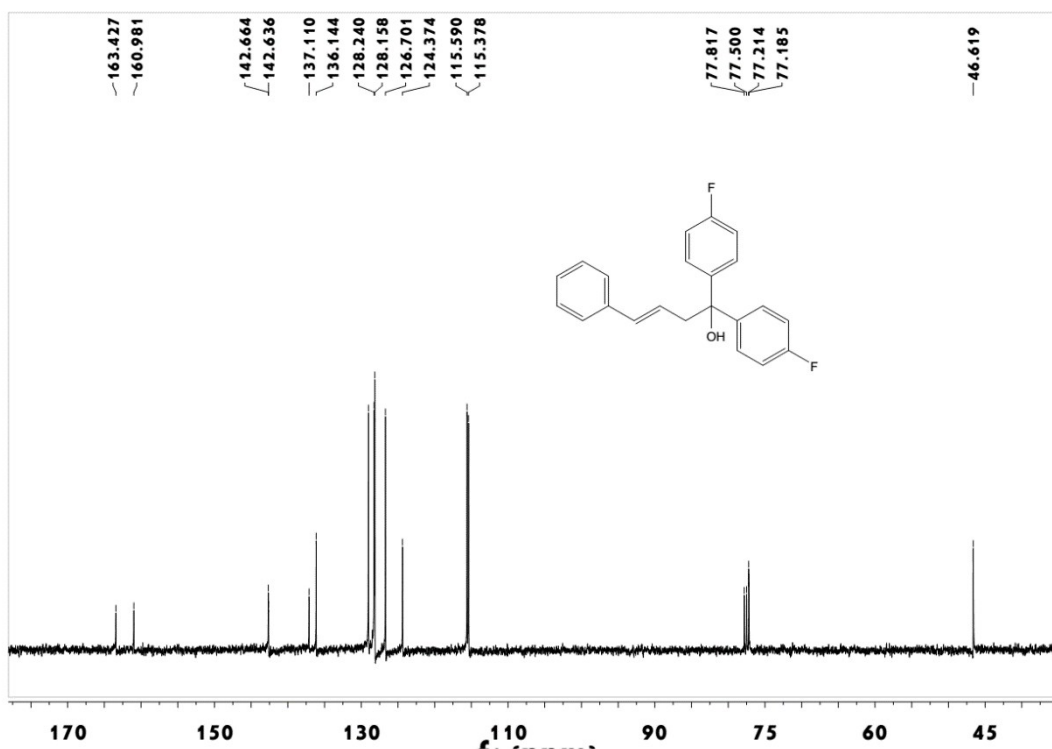

$^1\text{H}$ - and  $^{13}\text{C}$ -NMR for **2u**

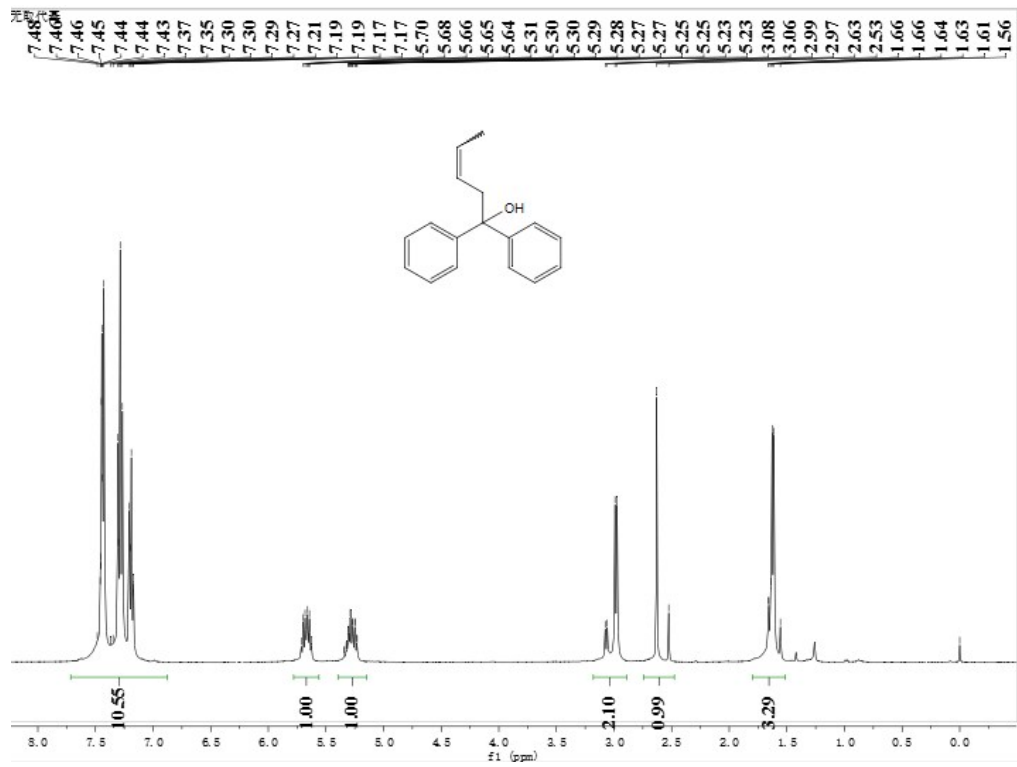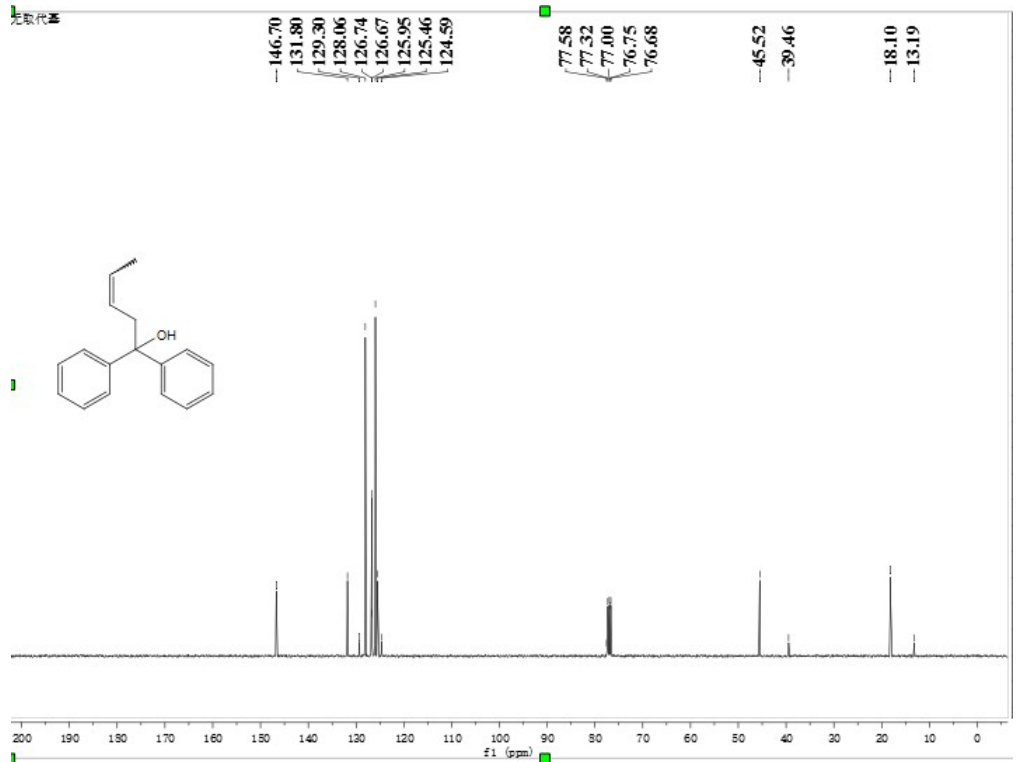

$^1\text{H}$ - and  $^{13}\text{C}$ -NMR for 2v

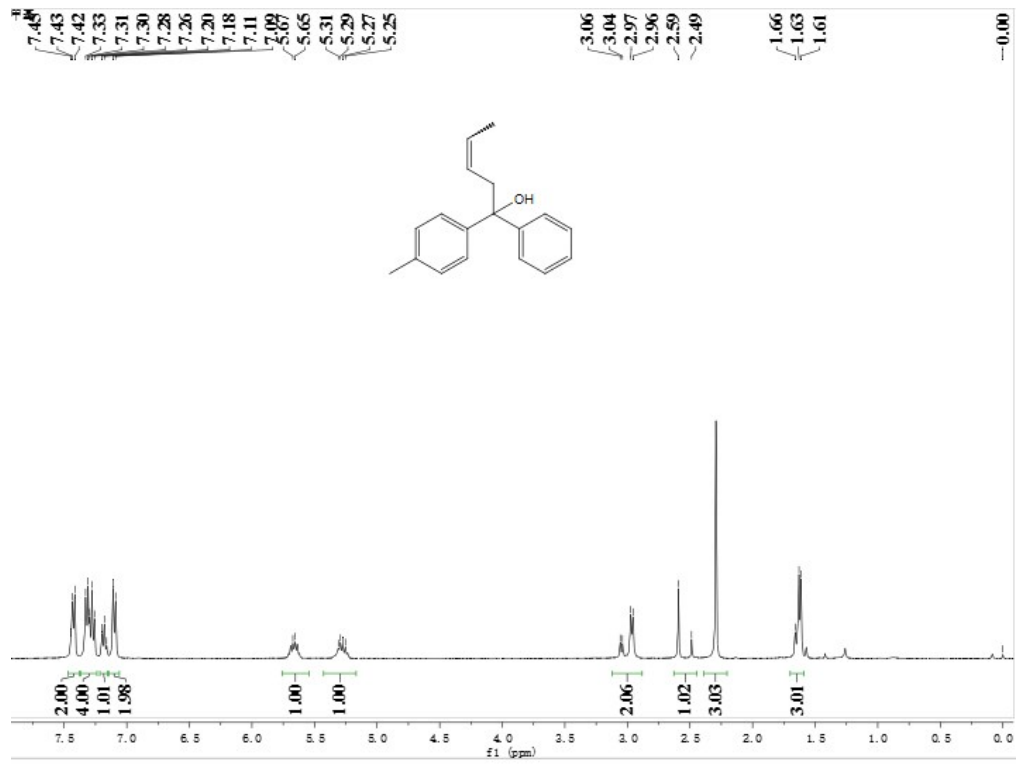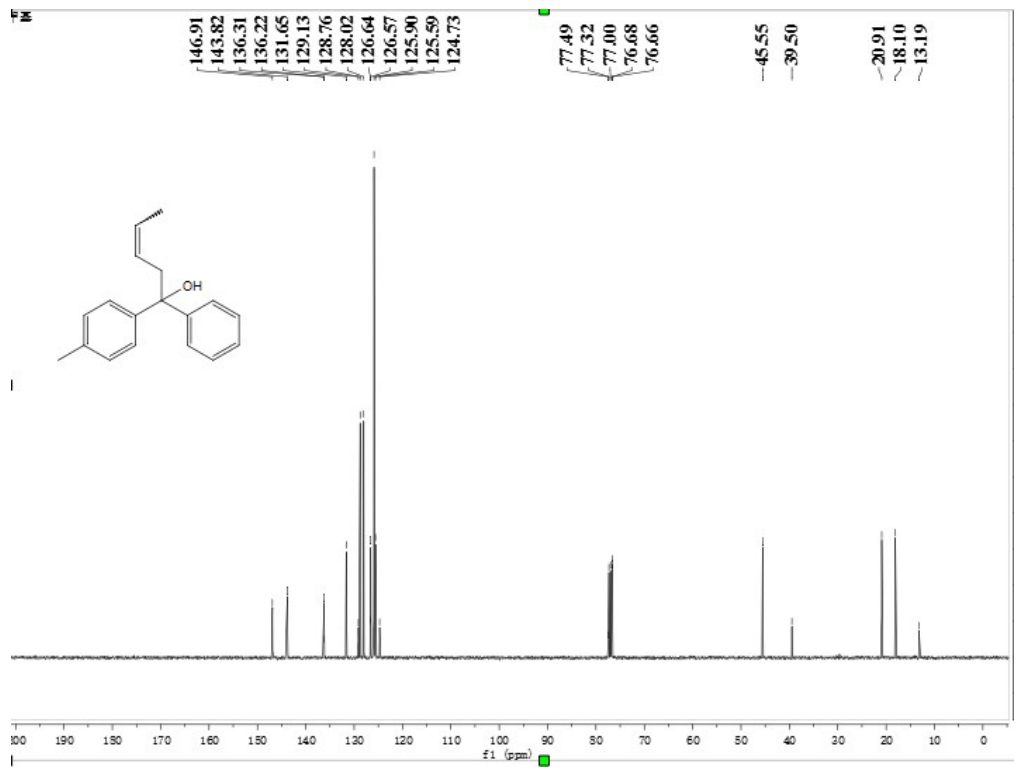

$^1\text{H}$ - and  $^{13}\text{C}$ -NMR for **2w**

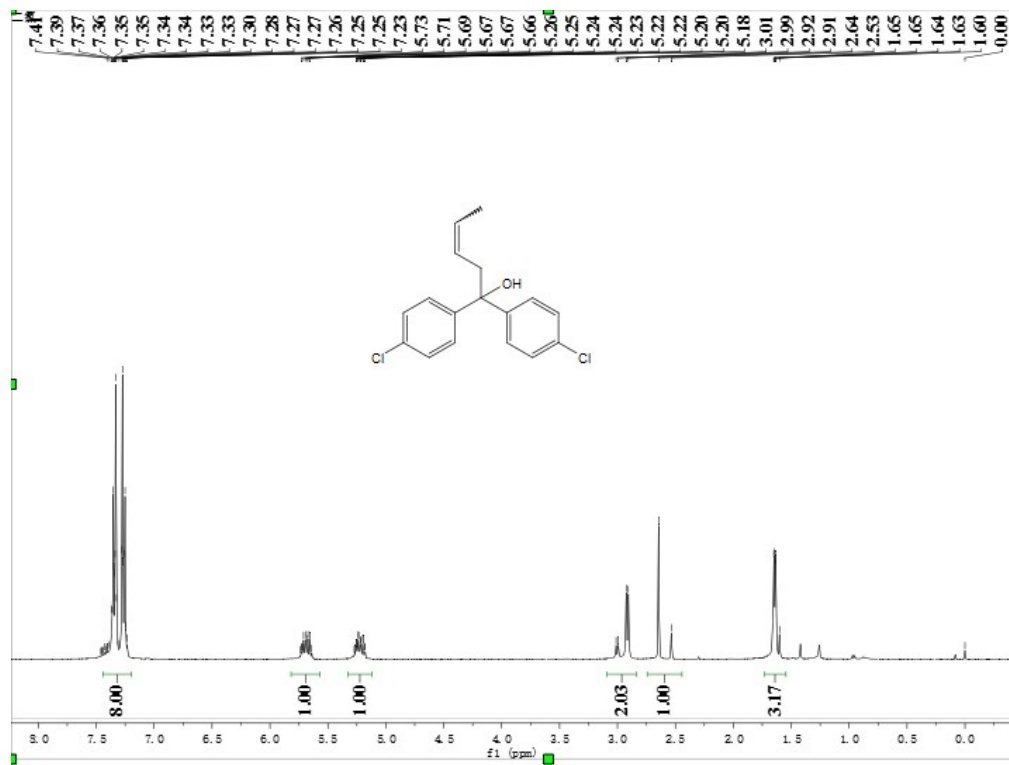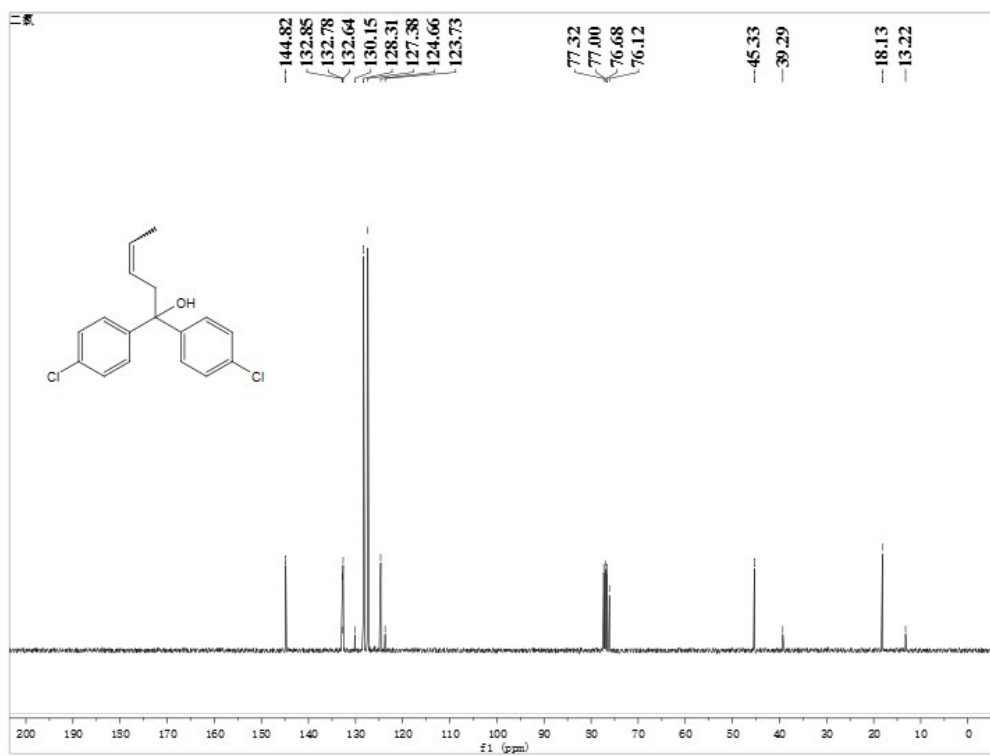

$^1\text{H}$ - and  $^{13}\text{C}$ -NMR for **2b'**

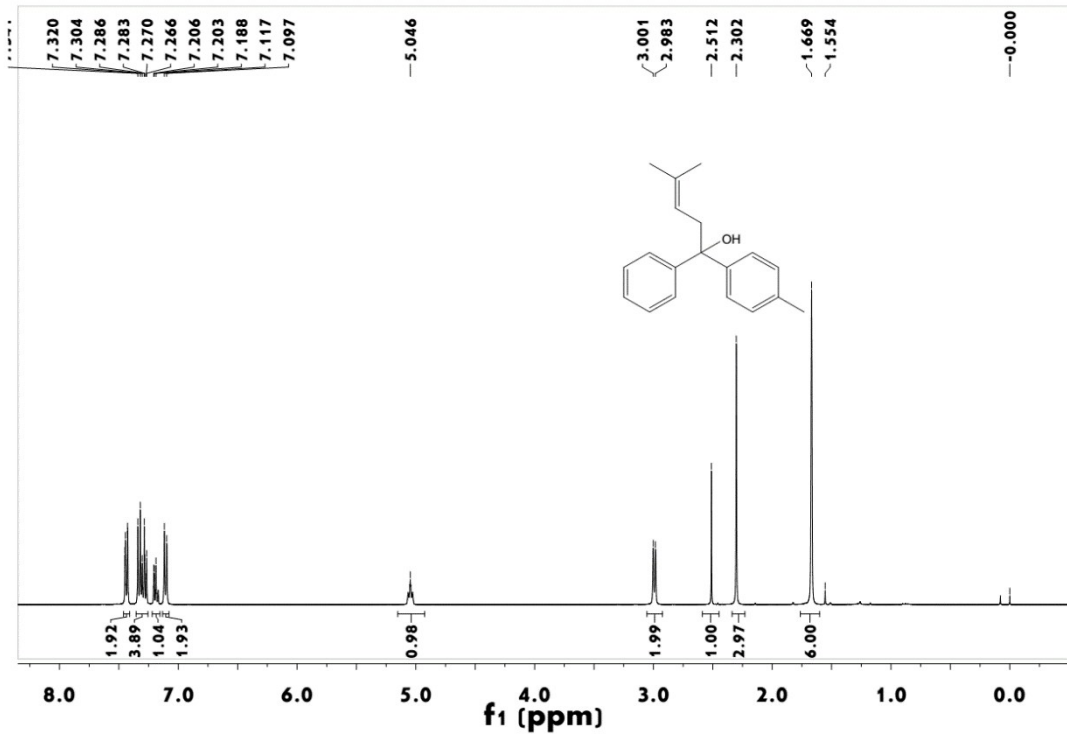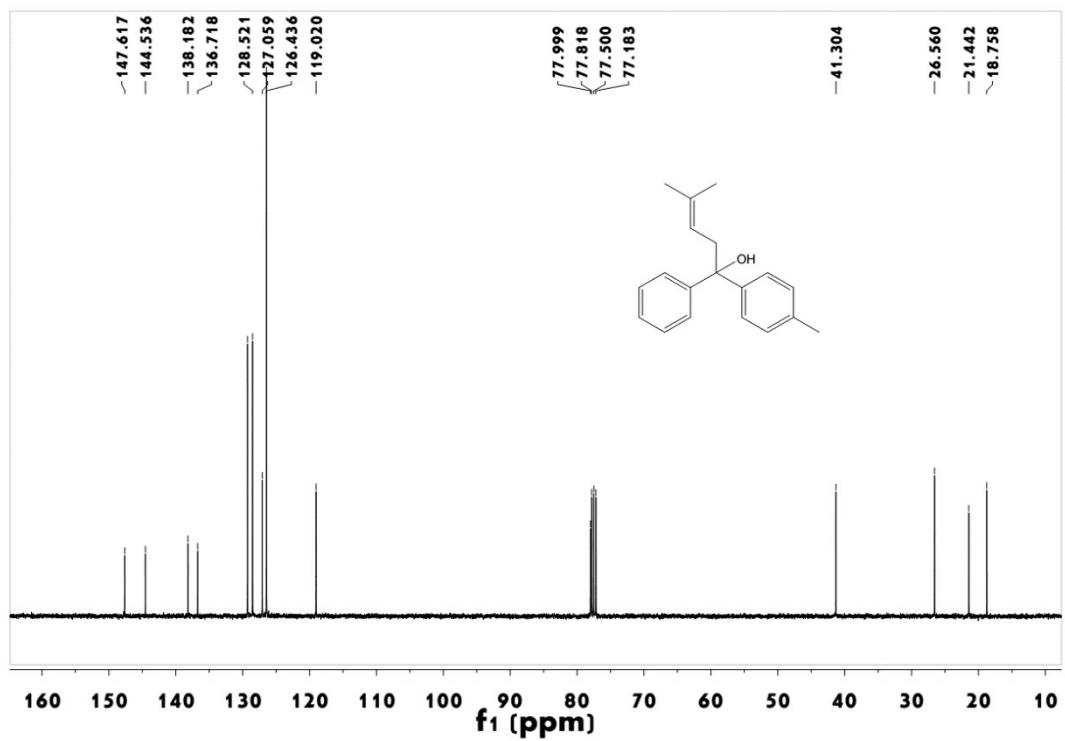

$^1\text{H}$ - and  $^{13}\text{C}$ -NMR for **2c'**

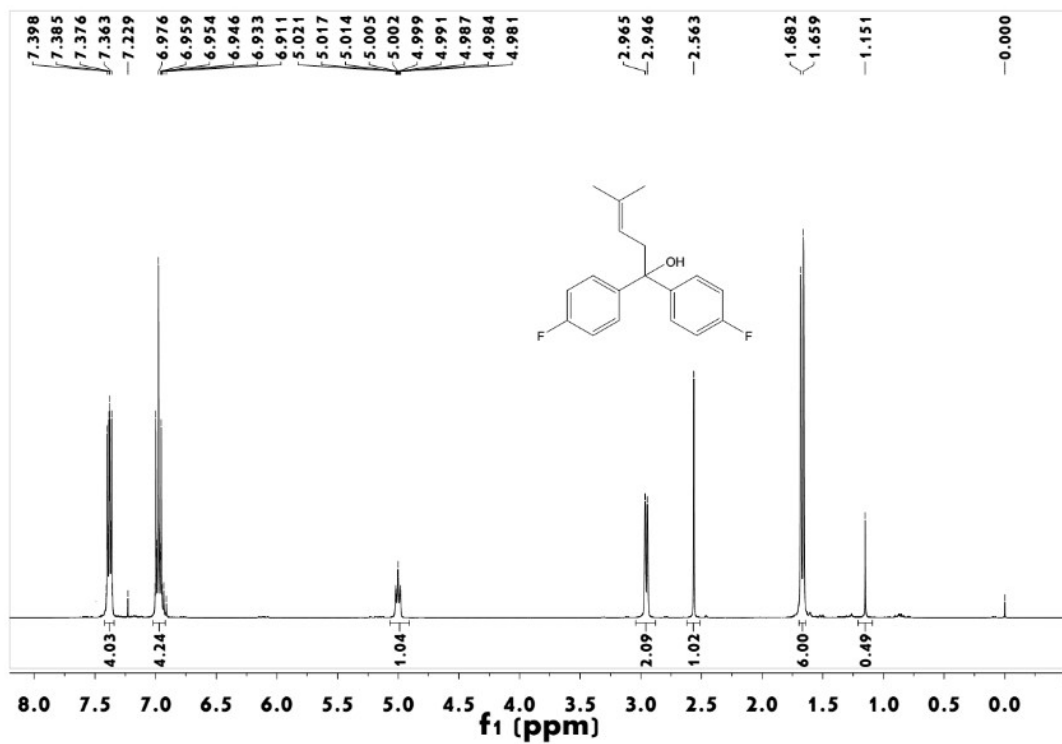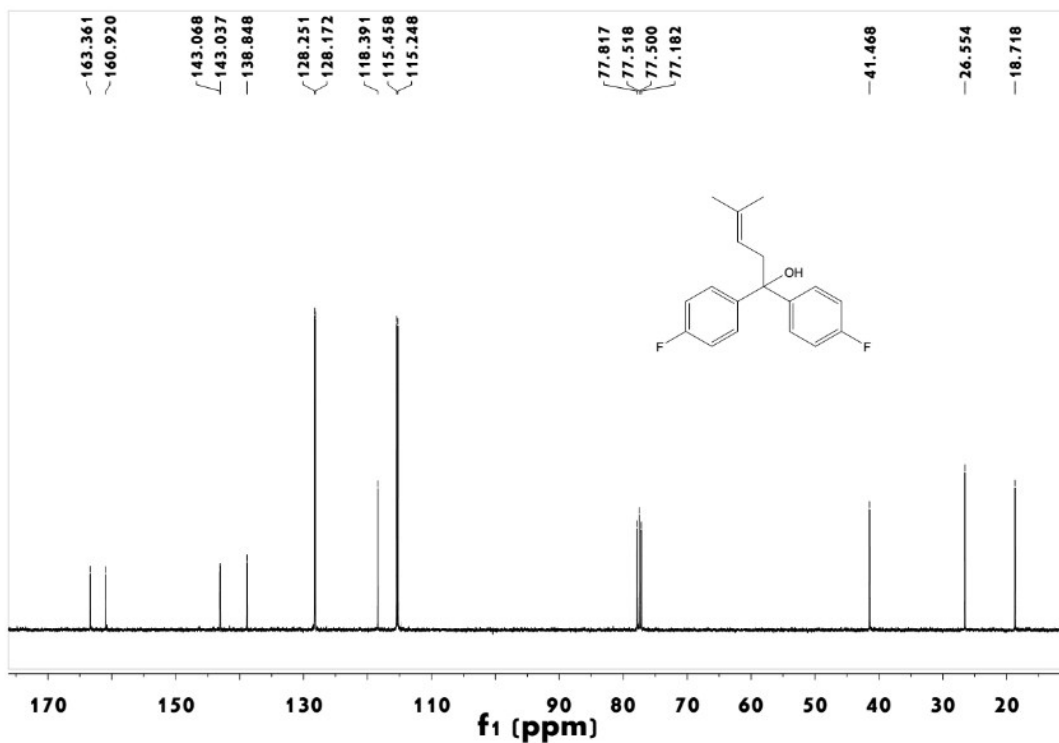

$^1\text{H}$ - and  $^{13}\text{C}$ -NMR for **2d'**

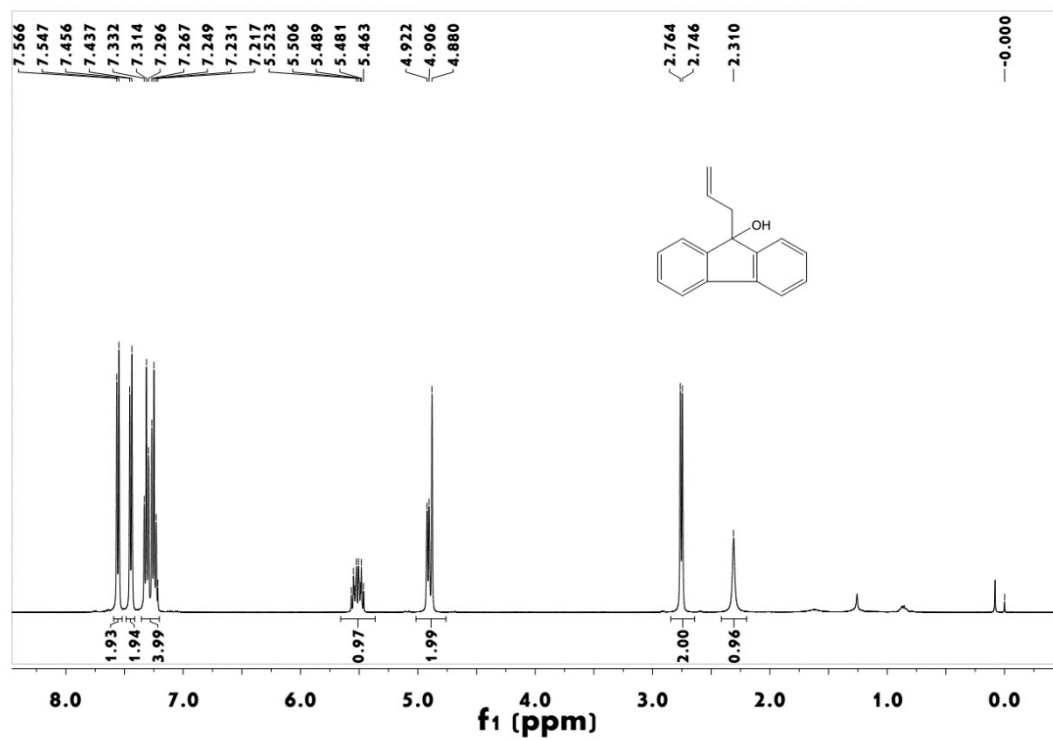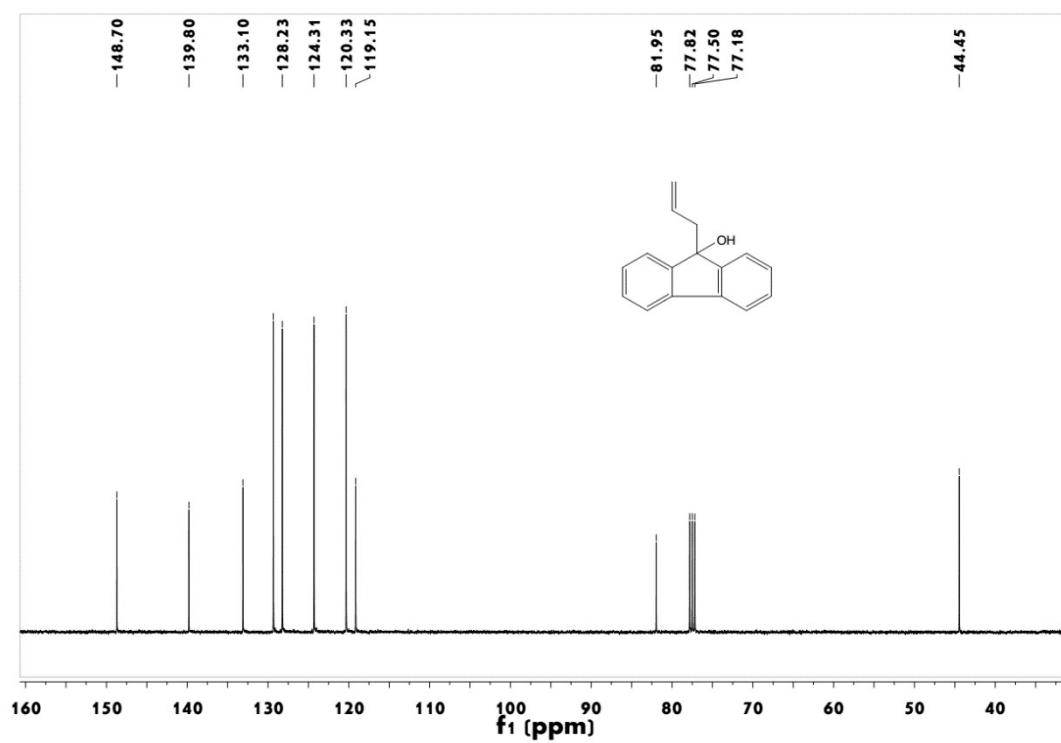

$^1\text{H}$ - and  $^{13}\text{C}$ -NMR for **2e'**

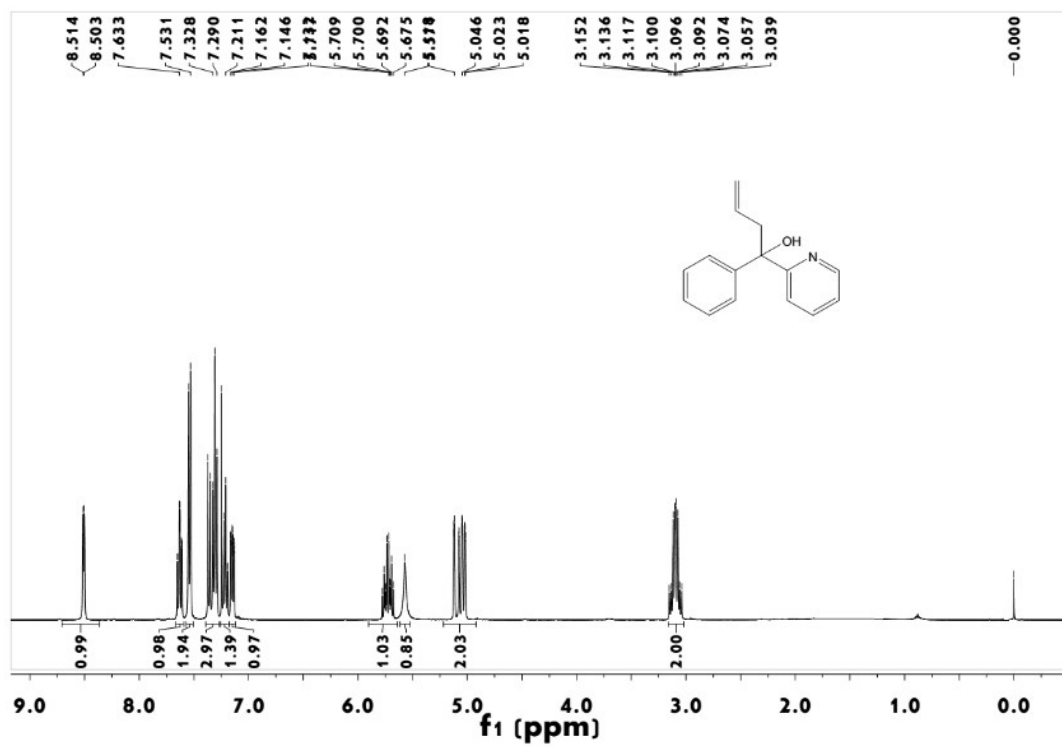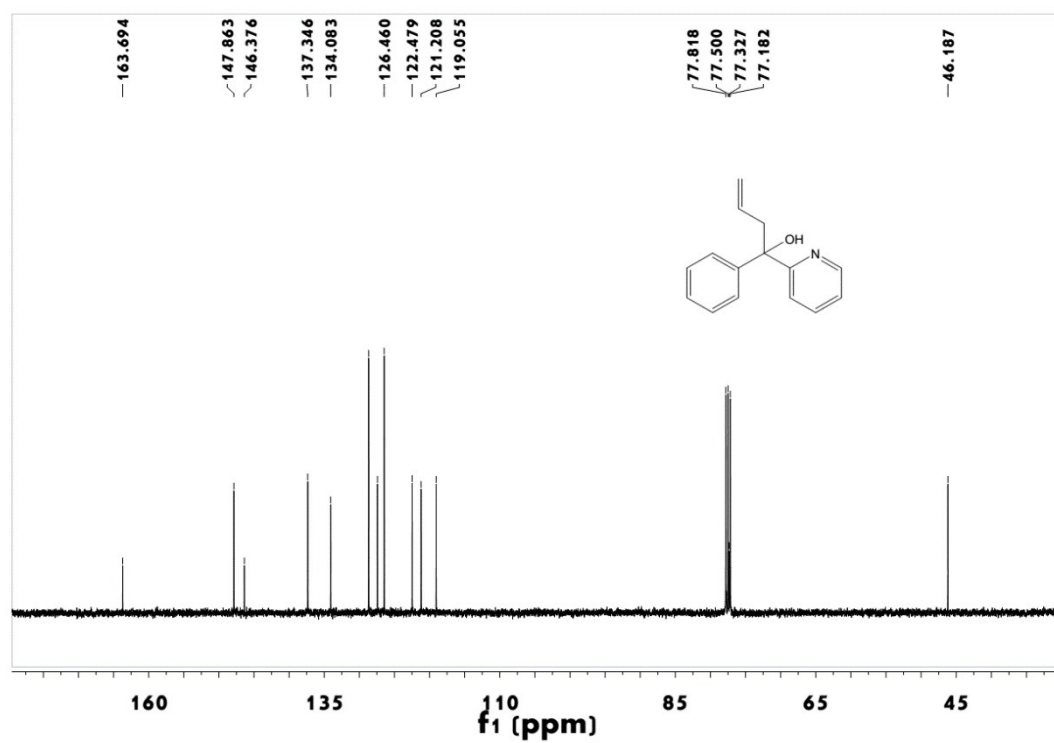



$^1\text{H}$ - and  $^{13}\text{C}$ -NMR for **2f**

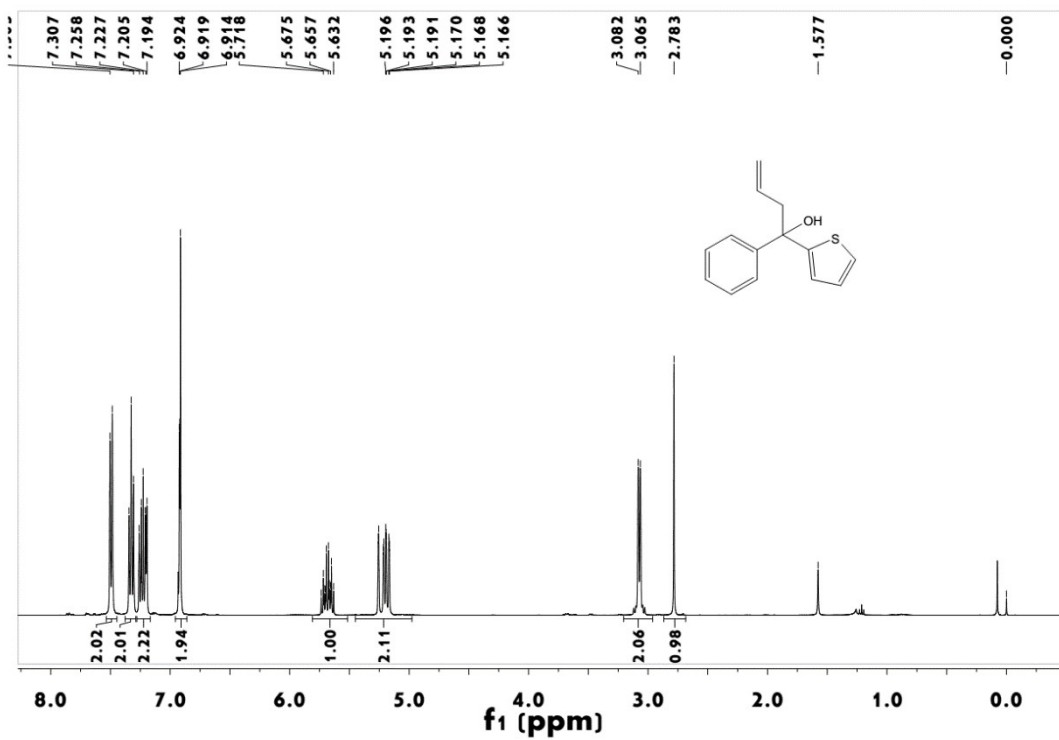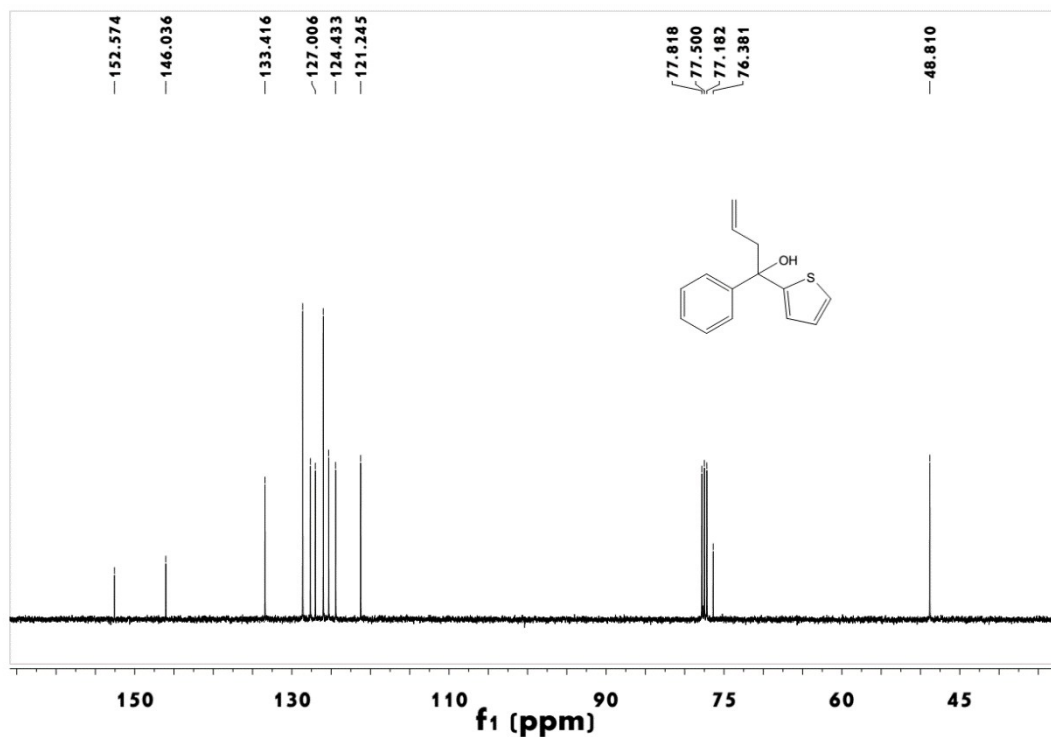

$^1\text{H}$ - and  $^{13}\text{C}$ -NMR for **2g'**

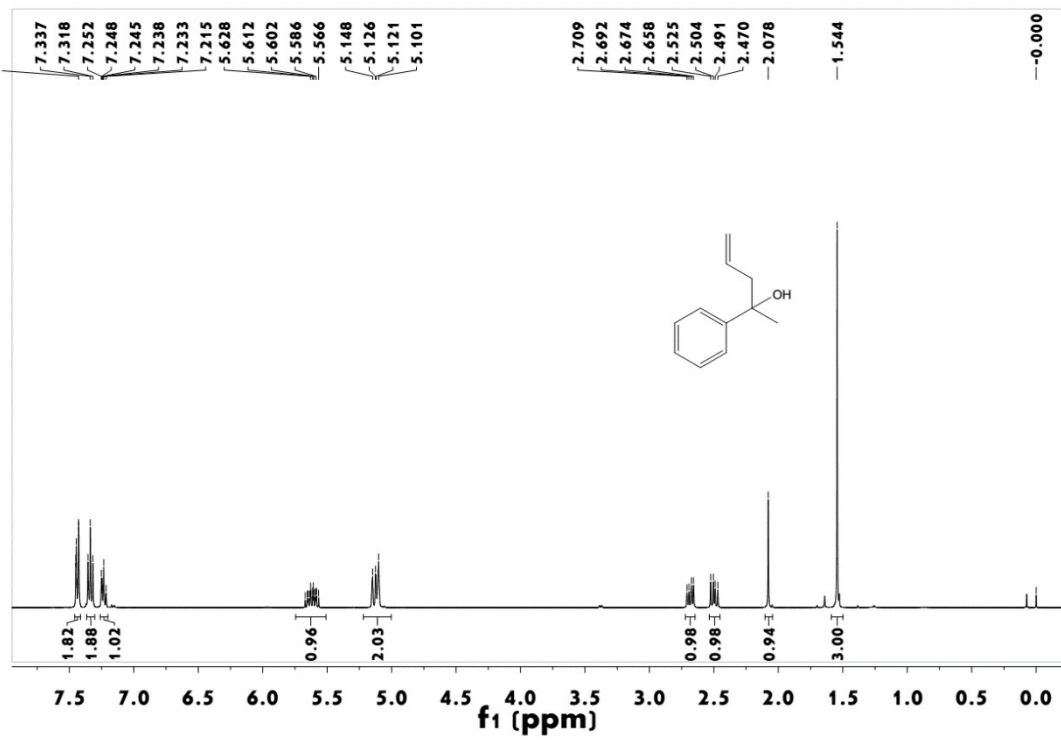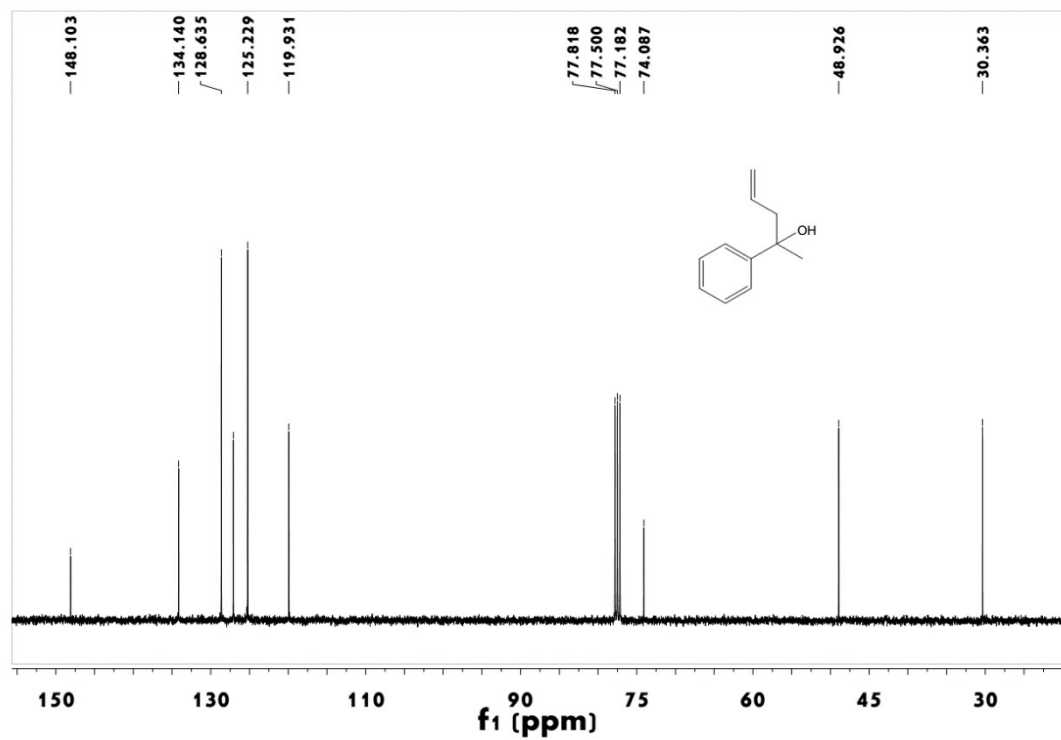

Supplement: c6ra18378f1.pdf [file c6ra18378f1.pdf]
